# Supplementary material for: Design and synthesis of nonpeptidic, small molecule inhibitors for the Mycobacterium tuberculosis protein tyrosine phosphatase PtpB
Source: Royal Society of Chemistry journal article supplement (doi:10.1039/c0ob00182a), 2010-01-01
Supplement: c0ob00182a.pdf [file c0ob00182a.pdf]

# Design and Synthesis of Nonpeptidic, Small Molecule Inhibitors for the *Mycobacterium tuberculosis* Protein Tyrosine Phosphatase PtpB

Katherine A. Rawls,<sup>a</sup> Christoph Grundner<sup>b</sup> and Jonathan A. Ellman<sup>\*a</sup>

<sup>a</sup>Department of Chemistry, University of California, Berkeley, California, 94720-1460, USA. <sup>b</sup>Seattle Biomedical Research Institute, Seattle, WA 98109-5219, and Department of Global Health, University of Washington, Seattle, WA 98195-7660, USA.

## TABLE OF CONTENTS

|                                                            |     |
|------------------------------------------------------------|-----|
| Experimental Procedures and Analytical Data.....           | S2  |
| Assay Procedure and Determination of Inhibitor $K_i$ ..... | S9  |
| Analytical Data for Determination of Inhibitor $K_i$ ..... | S9  |
| NMR Spectra.....                                           | S11 |
| <sup>1</sup> H-NMR of Compound <b>8</b> .....              | S11 |
| <sup>19</sup> F-NMR of Compound <b>8</b> .....             | S12 |
| <sup>1</sup> H-NMR of Compound <b>10</b> .....             | S13 |
| <sup>19</sup> F-NMR of Compound <b>10</b> .....            | S14 |
| <sup>1</sup> H-NMR of Compound <b>11</b> .....             | S15 |
| <sup>19</sup> F-NMR of Compound <b>11</b> .....            | S16 |
| <sup>1</sup> H-NMR of Compound <b>12</b> .....             | S17 |
| <sup>19</sup> F-NMR of Compound <b>12</b> .....            | S18 |
| <sup>1</sup> H-NMR of Compound <b>2</b> .....              | S19 |
| <sup>19</sup> F-NMR of Compound <b>2</b> .....             | S20 |
| <sup>1</sup> H-NMR of Compound <b>21</b> .....             | S21 |
| <sup>19</sup> F-NMR of Compound <b>21</b> .....            | S22 |
| <sup>31</sup> P-NMR of Compound <b>21</b> .....            | S23 |
| <sup>1</sup> H-NMR of Compound <b>3</b> .....              | S24 |
| <sup>19</sup> F-NMR of Compound <b>3</b> .....             | S25 |
| <sup>31</sup> P-NMR of Compound <b>3</b> .....             | S26 |
| References.....                                            | S27 |

## General Synthetic Methods

Unless otherwise noted, all reagents were obtained from commercial suppliers and used without further purification. Tetrahydrofuran (THF), dichloromethane ( $\text{CH}_2\text{Cl}_2$ ), toluene, and diethyl ether ( $\text{Et}_2\text{O}$ ) were dried over alumina under a nitrogen atmosphere. Solvents used for reactions set up in a nitrogen-filled Braun inert atmosphere box, including THF and toluene, were additionally degassed with three consecutive freeze pump thaw cycles and stored over 3Å molecular sieves. Methanol was dried over calcium hydride under a nitrogen atmosphere. All reactions, unless otherwise stated, were performed under inert atmosphere using syringe, cannula, and Schlenk techniques, or set up in a nitrogen-filled Braun inert atmosphere box, with flame or oven-dried glassware. All  $^1\text{H}$ ,  $^{19}\text{F}$ , and  $^{31}\text{P}$  NMR spectra were measured with a Bruker DRX-500, AVB-400, AVQ-400 or AV-300 spectrometer. NMR chemical shifts are reported in ppm relative to 1,2-difluorobenzene (-138.9) for  $^{19}\text{F}$  NMR and trimethylphosphate (3.0) for  $^{31}\text{P}$  NMR. Mass spectrometry (HRMS) was carried out by the University of California, Berkeley Mass Spectrometry Facility.

## Synthesis of Isothiazolidinone Inhibitors 2, 15, and 16

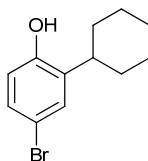

**4**

**Compound 4.** Compound **4** was synthesized as described in the literature.<sup>1</sup>

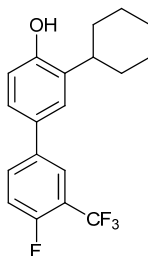

**6**

**Compound 6.** Compound **6** was synthesized as described in the literature.<sup>1</sup>

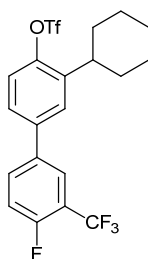

**7**

**Compound 7.** Compound **7** was synthesized as described in the literature.<sup>1</sup>

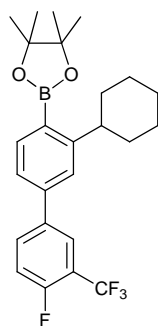

**8**

**Compound 8.** To a 10 mL Schlenk tube fitted with a stirbar in a nitrogen-filled Braun inert atmosphere box was added compound **7** (0.72 g, 1.53 mmol), followed by bis(pinacolato)diboron (1.16 g, 4.59 mmol),  $K_3PO_4$  (0.97 g, 4.59 mmol), tris(dibenzylideneacetone)dipalladium-chloroform adduct (47 mg, 0.04 mmol, 3.0 mol%), and 2-dicyclohexylphosphino-2',6'-dimethoxybiphenyl (SPhos, 38 mg, 0.08 mmol, 6.0 mol%). Toluene (3.06 mL) was then added and the reaction tube was closed under  $N_2$  atmosphere. The resulting mixture was then heated with stirring in an oil bath at 110 °C for 22 hours. The reaction mixture was then diluted with  $Et_2O$  and passed through a pad of Celite. The solvent was removed under reduced pressure to provide crude **8**, which was purified via automated reversed-phase C18 chromatography (linear gradient of 80 to 95% acetonitrile in  $H_2O$ ) to yield compound **8** (0.47 g, 69% yield) as an off-white solid; mp 81-83 °C;  $\delta_H$ (400 MHz;  $CDCl_3$ ;  $Me_4Si$ ) 7.82-7.73 (m, 3H), 7.41 (m, 1H), 7.33 (dd,  $J = 7.7, 1.6$  Hz, 1H), 7.28-7.24 (m, 1H), 3.38-3.29 (m, 1H), 1.91-1.75 (m, 5H), 1.53-1.43 (m, 5H), 1.37 (s, 12H);  $\delta_F$ (376 MHz;  $CDCl_3$ ; 1,2-difluorobenzene) -60.51 (d,  $J = 6.3$  Hz), -116.51 (m); HRMS  $m/z$  (EI)  $[M + H]^+$  found 448.2197,  $C_{25}H_{29}BF_4O_2$  requires 448.2189.

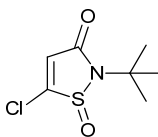

**9**

**Compound 9.** Compound **9** was synthesized via modified literature procedures.<sup>2</sup> Analytical data was found to match that of previous literature reports:<sup>2</sup>  $\delta_H$ (400 MHz;  $CDCl_3$ ;  $Me_4Si$ ) 6.55 (s, 1H), 1.64 (s, 9H).

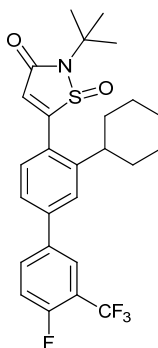

**10**

**Compound 10.** To a 1 mL Schlenk tube fitted with a stirbar in a nitrogen-filled Braun inert atmosphere box was added compound **8** (34 mg, 0.10 mmol), followed by compound **9** (41 mg, 0.15 mmol),  $K_3PO_4$  (127 mg, 0.600 mmol), palladium acetate (3.4 mg, 0.02 mmol, 15 mol%), and 2-dicyclohexylphosphino-2',6'-dimethoxybiphenyl (SPhos, 12 mg, 0.04 mmol, 30 mol%). A 10:1 THF: $H_2O$  solution (0.20 mL) was then added and the reaction tube was closed under  $N_2$  atmosphere. The

resulting mixture was then heated with stirring in an oil bath at 60 °C for 24 h. The reaction mixture was then diluted with Et<sub>2</sub>O and passed through a pad of Celite. The solvent was removed under reduced pressure to provide crude **10**, which was purified via automated silica gel chromatography (linear gradient of 2 to 15% EtOAc in hexanes) to yield compound **10** (34 mg, 69% yield) as a yellow solid;  $\delta_{\text{H}}$ (400 MHz; CDCl<sub>3</sub>; Me<sub>4</sub>Si) 7.79-7.77 (m, 2H), 7.54 (m, 1H), 7.45 (m, 2H), 7.33-7.30 (m, 1H), 6.48 (s, 1H), 2.80-2.70 (m, 1H), 1.95-1.73 (m, 5H), 1.72 (s, 9H), 1.55-1.30 (m, 5H);  $\delta_{\text{F}}$ (376 MHz; CDCl<sub>3</sub>; 1,2-difluorobenzene) -60.57 (d,  $J$  = 12.6 Hz), -115.18 (m); HRMS  $m/z$  (EI) [M + H]<sup>+</sup> found 494.1777, C<sub>26</sub>H<sub>28</sub>F<sub>4</sub>NO<sub>2</sub>S requires 494.1772.

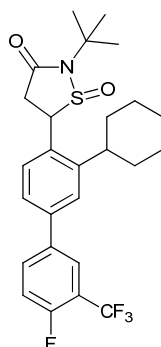

**11**

**Compound 11.** To a 10 mL flask fitted with a stirbar under N<sub>2</sub> was added compound **10** (263 mg, 0.530 mmol) and MeOH (1.77 mL), followed by cooling to 0 °C. Sodium borohydride (40 mg, 1.07 mmol) was then added and the resulting slurry was stirred at 0 °C for 2 h. The reaction was quenched at 0 °C by dropwise addition of a 10% solution of acetic acid in THF, with the flask open to the atmosphere. The mixture was concentrated to remove MeOH to give crude **11**, which was purified by recrystallization from EtOAc/MeOH to give compound **11** (219 mg, 83% yield) as an off-white solid;  $\delta_{\text{H}}$ (400 MHz; CDCl<sub>3</sub>; Me<sub>4</sub>Si) 7.90-7.68 (m, 2H), 7.55 (d,  $J$  = 8.2 Hz, 1H), 7.47 (d,  $J$  = 1.7 Hz, 1H), 7.42 (dd,  $J$  = 8.1, 1.8 Hz, 1H), 7.31-7.24 (m, 1H), 7.31-7.24 (m, 1H), 4.64 (dd,  $J$  = 12.0, 7.1 Hz, 1H), 3.57 (dd,  $J$  = 17.1, 12.0, 1H), 3.02 (dd,  $J$  = 17.0, 7.1 Hz, 1H), 2.84-2.79 (m, 1H), 1.98-1.77 (m, 5H), 1.65 (s, 9H), 1.63-1.50 (m, 5H);  $\delta_{\text{F}}$ (376 MHz; CDCl<sub>3</sub>; 1,2-difluorobenzene) -60.50 (d,  $J$  = 12.4 Hz), -115.96 (m); HRMS  $m/z$  (ESI) [M + H]<sup>+</sup> found 496.1928, C<sub>26</sub>H<sub>30</sub>F<sub>4</sub>NO<sub>2</sub>S requires 496.1855.

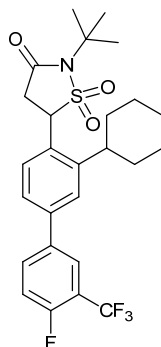

**12**

**Compound 12.** Compound **11** (219 mg, 0.44 mmol) was added to a flask under N<sub>2</sub>, dissolved in chloroform (5.5 mL), and cooled to 0 °C. 3-Chloroperoxybenzoic acid (>77%, 197 mg, 0.88 mmol) was added at 0 °C, and the reaction was allowed to warm to ambient temperature and stirred for 18 h. The reaction was quenched at 0 °C by dropwise addition of aqueous saturated NaHCO<sub>3</sub>, followed by extraction with NaHCO<sub>3</sub> (5 x 5 mL), and washing with brine (1 x 5 mL). The organic layer was dried over anhydrous Na<sub>2</sub>SO<sub>4</sub>(s) and filtered. The solvent was removed under reduced pressure to provide crude **12**,



HPLC trace of compound **2** (racemic IZD)

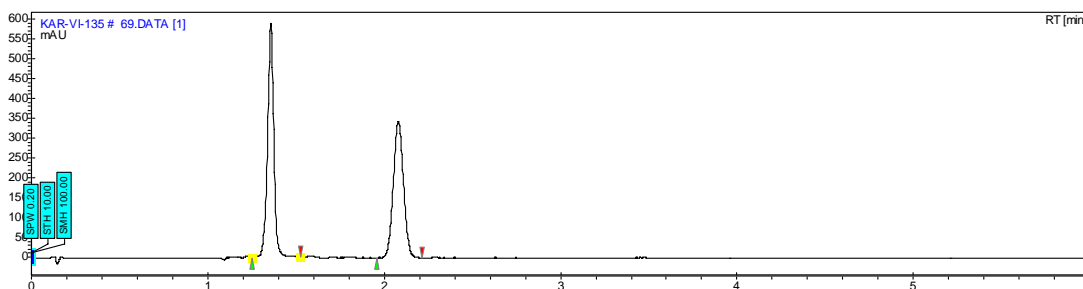

HPLC trace of enantiomerically pure **15** or **16** ("peak 1")

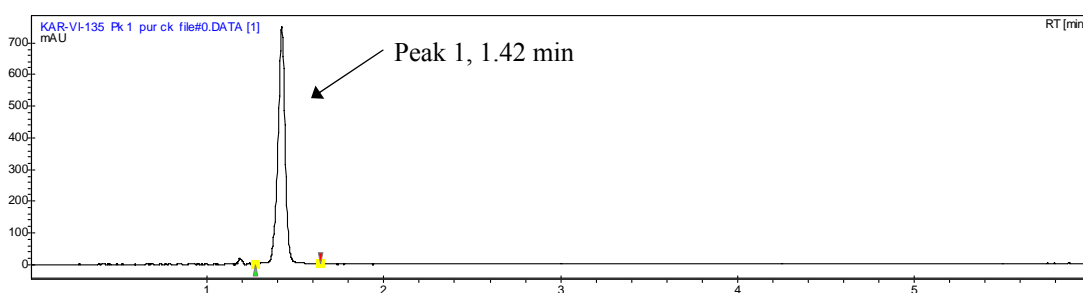

HPLC trace of enantiomerically pure **15** or **16** ("peak 2")

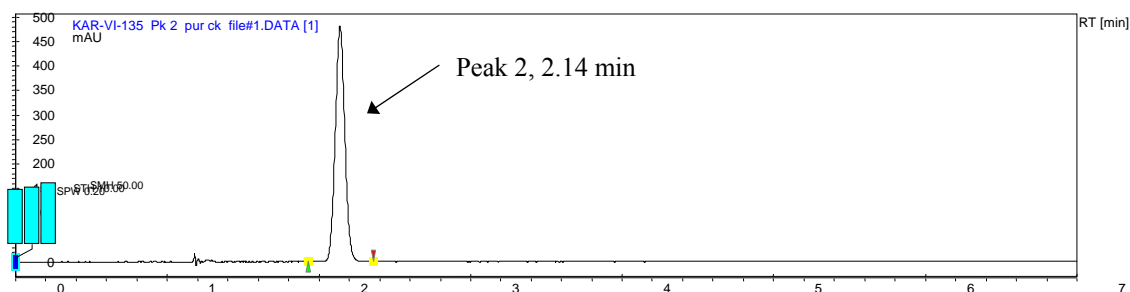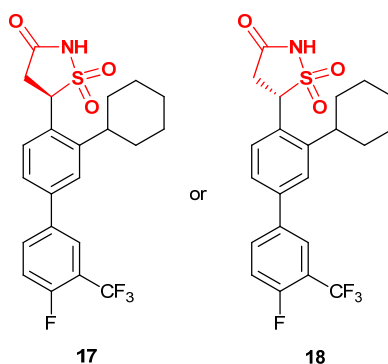

**Compounds 17 and 18.** Compounds **17** and **18** were synthesized via the procedure described for compound **2**, starting from enantiomerically pure compounds **15** and **16**.

### Synthesis of Difluoromethylphosphonic Acid Inhibitor 3

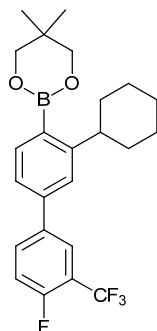

**19**

**Compound 19.** To a 5 mL Schlenk tube fitted with a stirbar in a nitrogen-filled Braun inert atmosphere box was added compound **7** (100 mg, 0.21 mmol), followed by bis(neopentylglycolato)diboron (96 mg, 0.43 mmol),  $K_3PO_4$  (90 mg, 0.43 mmol), tris(dibenzylideneacetone)dipalladium-chloroform adduct (13 mg, 0.01 mmol, 6.0 mol%), and 2-dicyclohexylphosphino-2',6'-dimethoxybiphenyl (SPhos, 11 mg, 0.02 mmol, 12.0 mol%). Toluene (0.43 mL) was added, and the reaction tube was closed under an  $N_2$  atmosphere. The resulting mixture was then heated with stirring in an oil bath at 100 °C for 26 h. The reaction mixture was diluted with  $Et_2O$  and passed through a pad of Celite. The solvent was removed under reduced pressure to provide crude **19**, which was purified via automated silica gel chromatography (linear gradient of 5 to 20%  $EtOAc$  in hexanes) to yield compound **19** (63 mg, 92% pure by NMR) as a yellow-orange solid, which was taken on without further purification;  $\delta_H$ (400 MHz;  $CDCl_3$ ;  $Me_4Si$ ) 7.81-7.71 (m, 3H), 7.42-7.40 (m, 1H), 7.32 (dd,  $J$  = 7.7, 1.8 Hz, 1H), 7.28-7.22 (m, 1H), 3.80 (s, 4H), 3.33-3.23 (m, 1H), 1.96-1.73 (m, 5H), 1.53-1.36 (m, 5H), 1.07 (s, 6H);  $\delta_F$ (376 MHz;  $CDCl_3$ ; 1,2-difluorobenzene) -60.50 (d,  $J$  = 12.5 Hz), -116.83 (m).

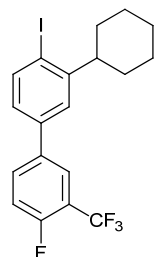

**20**

**Compound 20.** Compound **19** (416 mg, 0.96 mmol) was added to a flask under  $N_2$  and dissolved in THF (4.8 mL). Sodium iodide was then added as a 1.0 N solution in water (1.2 mL) followed by chloramine-T (541 mg, 1.92 mmol). The resulting mixture was stirred vigorously for 15 min at room temperature. The reaction was quenched by addition of  $H_2O$ , and the aqueous layer extracted with  $Et_2O$  (3 x 5 mL). The organic layer was dried over anhydrous  $Na_2SO_4$ (s) and filtered. The solvent was removed under reduced pressure to provide crude **20**, which was purified via automated silica gel chromatography (linear gradient of 3-10%  $EtOAc$  in hexanes) to yield compound **20** (188 mg, 71% pure by NMR) as a white solid, which was taken on without further purification;  $\delta_H$ (400 MHz;  $CDCl_3$ ;  $Me_4Si$ ) 7.90 (d,  $J$  = 8.1 Hz, 1H), 7.78-7.66 (m, 2H), 7.35-7.23 (m, 2H), 7.04 (dd,  $J$  = 8.1, 2.2 Hz, 1H), 2.85-2.80 (m, 1H), 2.02-1.75 (m, 5H), 1.58-1.32 (m, 5H);  $\delta_F$ (376 MHz;  $CDCl_3$ ; 1,2-difluorobenzene) -60.55 (d,  $J$  = 12.5 Hz), -115.90 (m).

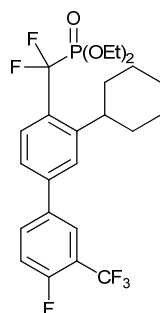

**21**

**Compound 21.** To a 25 mL flame-dried flask fitted with a stirbar under an N<sub>2</sub> atmosphere was added activated zinc dust (500 mg, 7.65 mmol), followed by *N,N*-dimethylacetamide (3.8 mL). The resulting mixture was heated to 60 °C in an oil bath with stirring. In a separate flask under an N<sub>2</sub> atmosphere, diethyl(bromodifluoromethyl)phosphonate (1.36 mL, 7.65 mmol) was dissolved in *N,N*-dimethylacetamide (3.8 mL), and this solution was added to the zinc mixture dropwise at 60 °C. The resulting mixture was stirred for 10 min at 60 °C, followed by stirring at ambient temperature for 4 h. In a separate 10 mL flask fitted with a stirbar under an N<sub>2</sub> atmosphere, compound **20** (135 mg, 0.30 mmol) and CuBr (86 mg, 0.60 mmol) were dissolved in *N,N*-dimethylacetamide (0.1 mL), followed by stirring for 30 min at ambient temperature. This solution was then added dropwise to the zinc solution, and the resulting mixture was sonicated for 12 h at ambient temperature. The reaction was quenched by addition of H<sub>2</sub>O (10 mL), and the resulting mixture was diluted with Et<sub>2</sub>O (15 mL), and filtered through Celite. The aqueous layer was extracted with Et<sub>2</sub>O (3 x 15 mL), and the organic layer was washed with brine (1 x 75 mL), dried over anhydrous Na<sub>2</sub>SO<sub>4</sub>(s) and filtered. The solvent was removed under reduced pressure to provide crude **21**, which was purified via automated silica gel chromatography (linear gradient of 6-25% EtOAc in hexanes) to yield compound **21** (77 mg, 50% yield) as a white solid;  $\delta_{\text{H}}$ (400 MHz; CDCl<sub>3</sub>; Me<sub>4</sub>Si) 7.81-7.70 (m, 2H), 7.63-7.58 (m, 1H), 7.57-7.53 (m, 1H), 7.43-7.38 (m, 1H), 7.32-7.26 (m, 1H), 4.32-4.12 (m, 4H), 3.28-3.17 (m, 1H), 1.96-1.73 (m, 5H), 1.56-1.38 (m, 5H), 1.35 (t,  $J = 7.1$  Hz, 6H);  $\delta_{\text{F}}$ (376 MHz; CDCl<sub>3</sub>; 1,2-difluorobenzene) -60.57 (d,  $J = 12.6$  Hz), -100.766 (d,  $J_{\text{FP}} = 116.3$  Hz), -115.51 (m);  $\delta_{\text{P}}$ (162 MHz; CD<sub>3</sub>OD; trimethylphosphate) 6.29 (t,  $J_{\text{PF}} = 116.2$  Hz); HRMS  $m/z$  (EI) [M + H]<sup>+</sup> found 509.1680, C<sub>24</sub>H<sub>28</sub>F<sub>6</sub>O<sub>3</sub>P requires 509.1690.

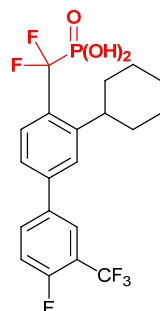

**3**

**Compound 3.** To a 5 mL flame-dried flask fitted with a stirbar under an N<sub>2</sub> atmosphere was added compound **21** (72 mg, 0.14 mmol) and CHCl<sub>3</sub> (0.24 mL). To the resulting solution was added iodotrimethylsilane (61  $\mu$ L, 0.43 mmol) dropwise by syringe. The resulting solution was stirred at ambient temperature for 14 h, and then the solvent was removed under reduced pressure to give crude **3** as an orange oil. The crude oil was dissolved in a minimal amount of dimethylsulfoxide (1.0 mL) which was purified by automated reversed-phase C18 column chromatography (linear gradient of 5 to 95% acetonitrile in H<sub>2</sub>O with 0.1% trifluoroacetic acid) to give compound **3** (42 mg, 66% yield) as a white powder; mp 149-150 °C;  $\delta_{\text{H}}$ (400 MHz; CD<sub>3</sub>COCD<sub>3</sub>) 8.08-7.96 (m, 2H), 7.83-7.77 (m, 1H), 7.65-7.47 (m, 2H), 6.61 (br s, 2H), 3.41-3.29 (m, 1H), 1.93-1.23 (m, 10H);  $\delta_{\text{F}}$ (376 MHz; CD<sub>3</sub>COCD<sub>3</sub>; 1,2-



difluorobenzene) -61.03 (d,  $J = 12.6$  Hz), -102.52 (d,  $J_{\text{FP}} = 113.7$  Hz), -118.01 (m);  $\delta_{\text{p}}$ (162 MHz;  $\text{CD}_3\text{COCD}_3$ ; trimethylphosphate) 5.96 (t,  $J_{\text{PF}} = 113.6$  Hz); HRMS  $m/z$  (EI)  $[\text{M} + \text{H}]^+$  found 475.0874,  $\text{C}_{20}\text{H}_{19}\text{F}_6\text{O}_3\text{Pna}$  requires 475.0873.

### Assay Procedure and Determination of Inhibitor $K_i$

96-well plates were used to run  $K_i$  assays, with reaction volumes of 100  $\mu\text{L}$  per well. 45  $\mu\text{L}$  of water was added to each well, followed by 20  $\mu\text{L}$  of sodium citrate buffer (stock solution: 100 mM sodium citrate, pH 6.2, 0.02% Triton X-100), 5  $\mu\text{L}$  of 20 mM ethylenediamine tetraacetic acid (EDTA) stock solution, 5  $\mu\text{L}$  of 20 mM DL-dithiothreitol (DTT) stock solution, and 10  $\mu\text{L}$  of 1  $\mu\text{M}$  PtpB stock solution. Then 5  $\mu\text{L}$  of the appropriate inhibitor stock solutions, serially diluted 2-fold for a total of 10 different concentrations in DMSO, plus one blank well as a control (DMSO only) was added to the wells and the plate was incubated at room temperature for 5 minutes. The reaction was started by addition of 10  $\mu\text{L}$  of 2 mM pNPP substrate stock, and reaction progress was monitored at 405 nm with continued incubation at ambient temperature. The initial rate data collected was used for the determination of  $K_i$  values. The kinetic values were obtained from nonlinear regression of substrate-velocity curves in the presence of various concentrations of inhibitor using the equation  $v = V_{\text{max}} * [\text{S}] / (K_{\text{M}}((1 + [\text{I}] / K_i) + [\text{S}]))$ .

### Analytical Data for Determination of Inhibitor $K_i$

Compounds **1-3** were assayed in duplicate, and repeated in at least triplicate. Compounds **16** and **17** were assayed in duplicate. Example  $K_i$  curves are provided, along with average  $K_i$  values and average Hill slopes for each inhibitor.

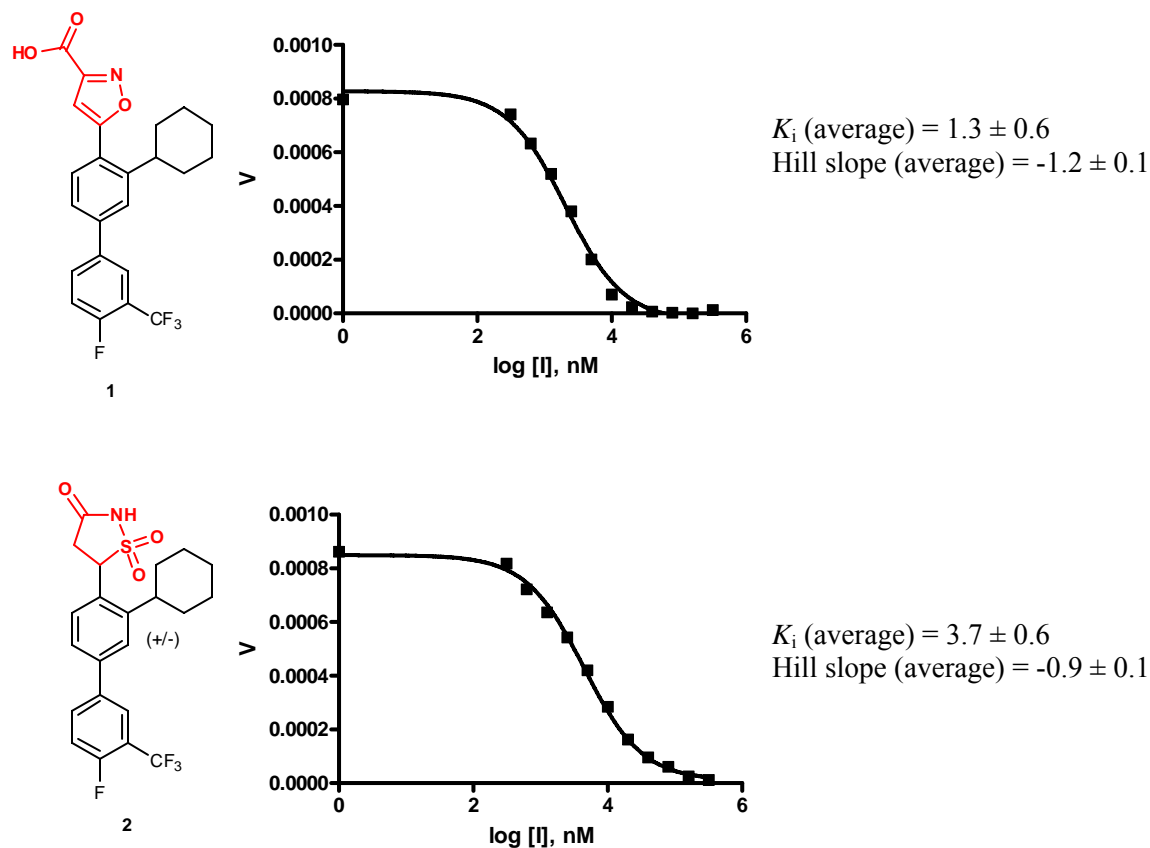

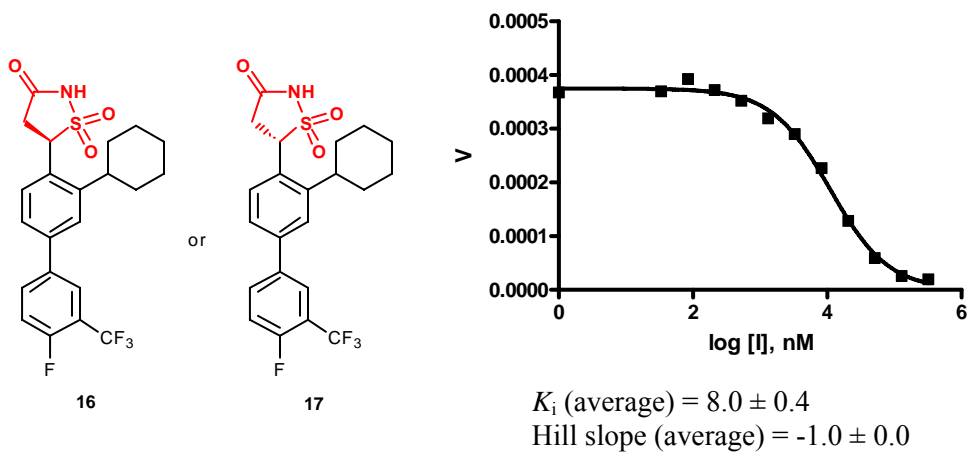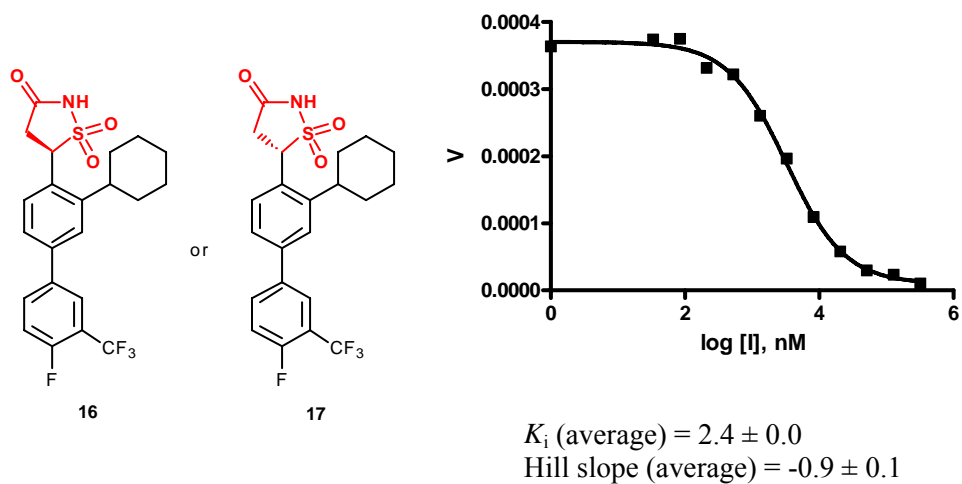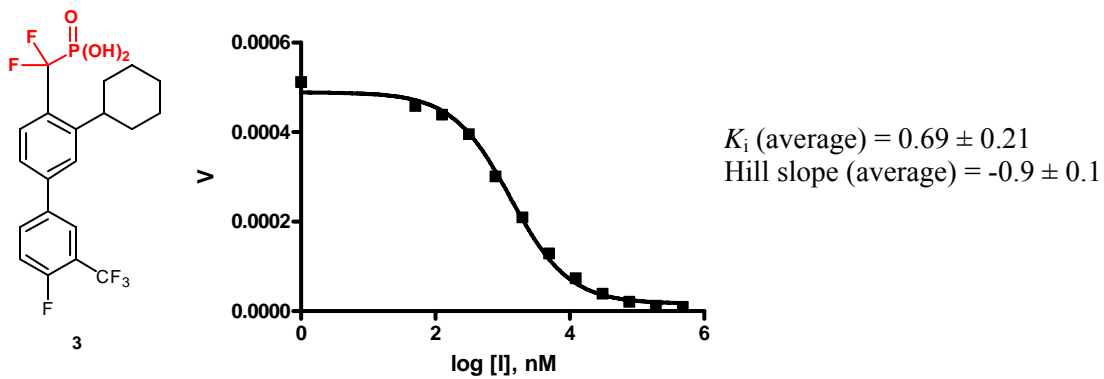

## NMR Spectra

### <sup>1</sup>H-NMR of Compound 8

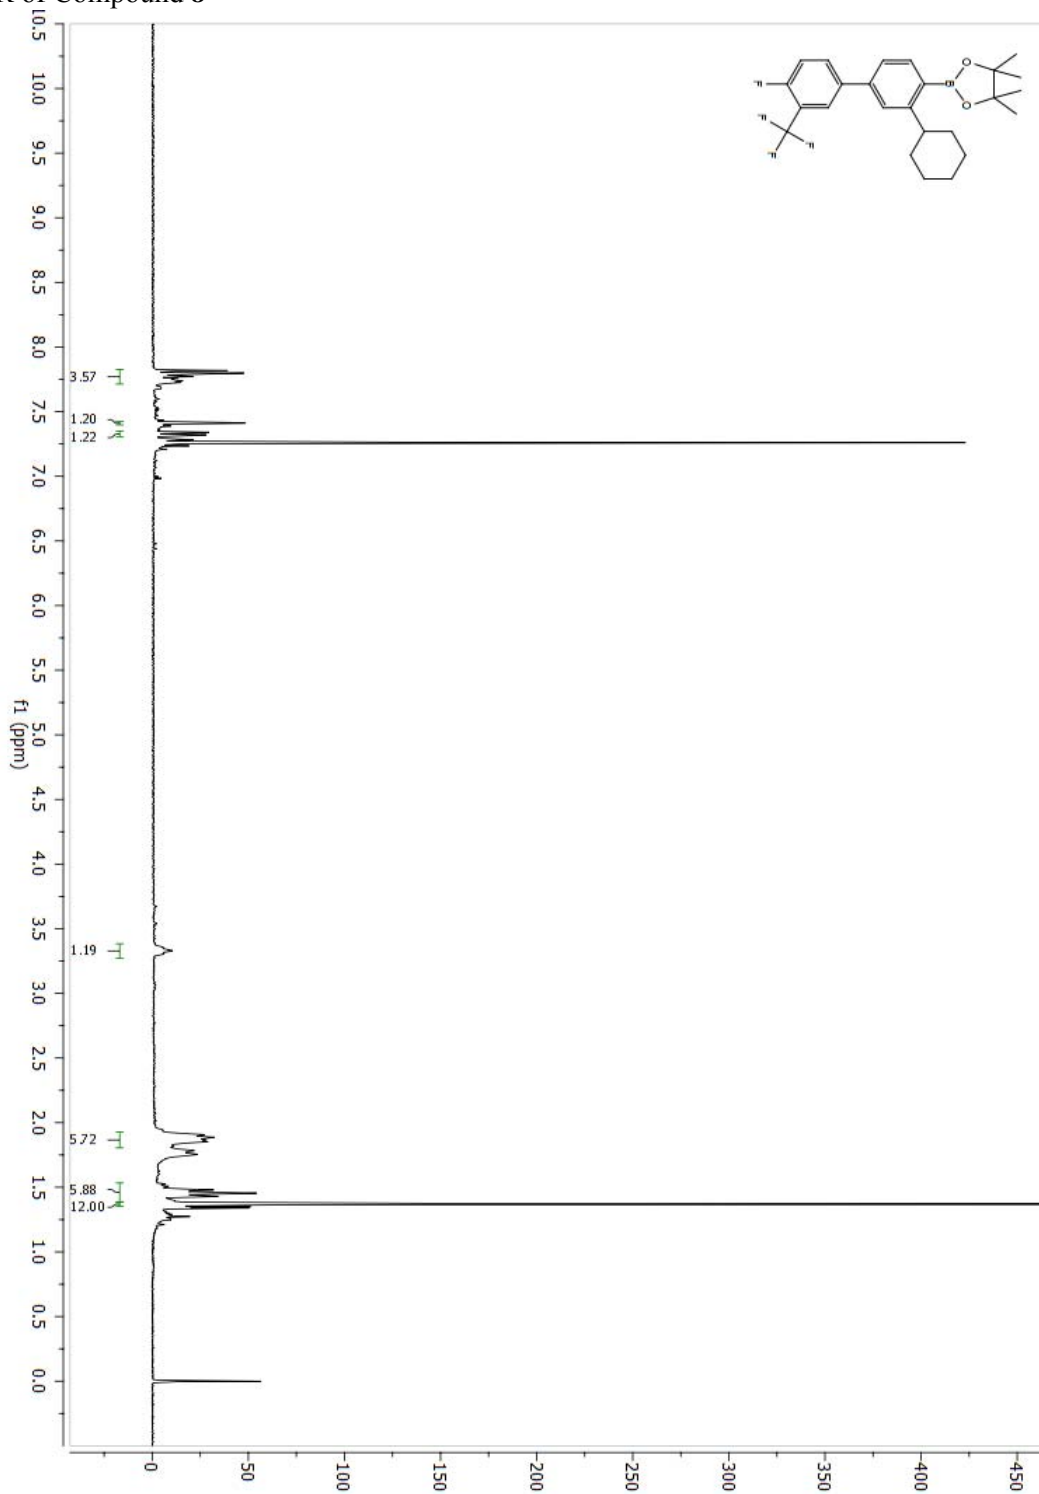

$^{19}\text{F}$ -NMR of Compound **8**

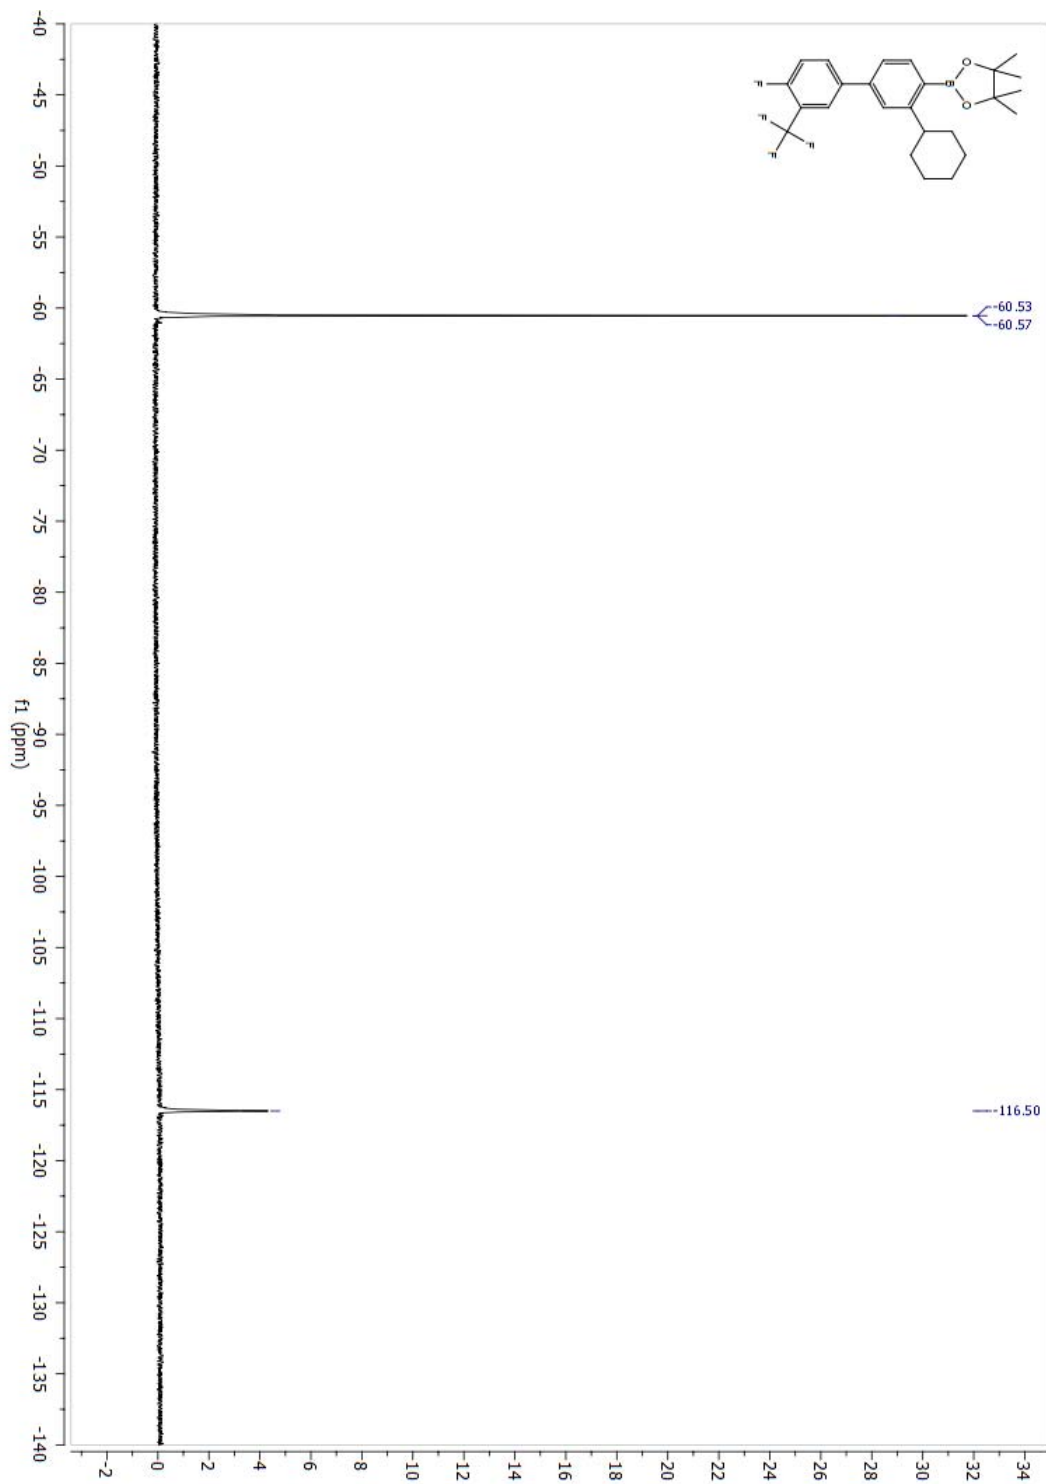

<sup>1</sup>H-NMR of Compound **10**

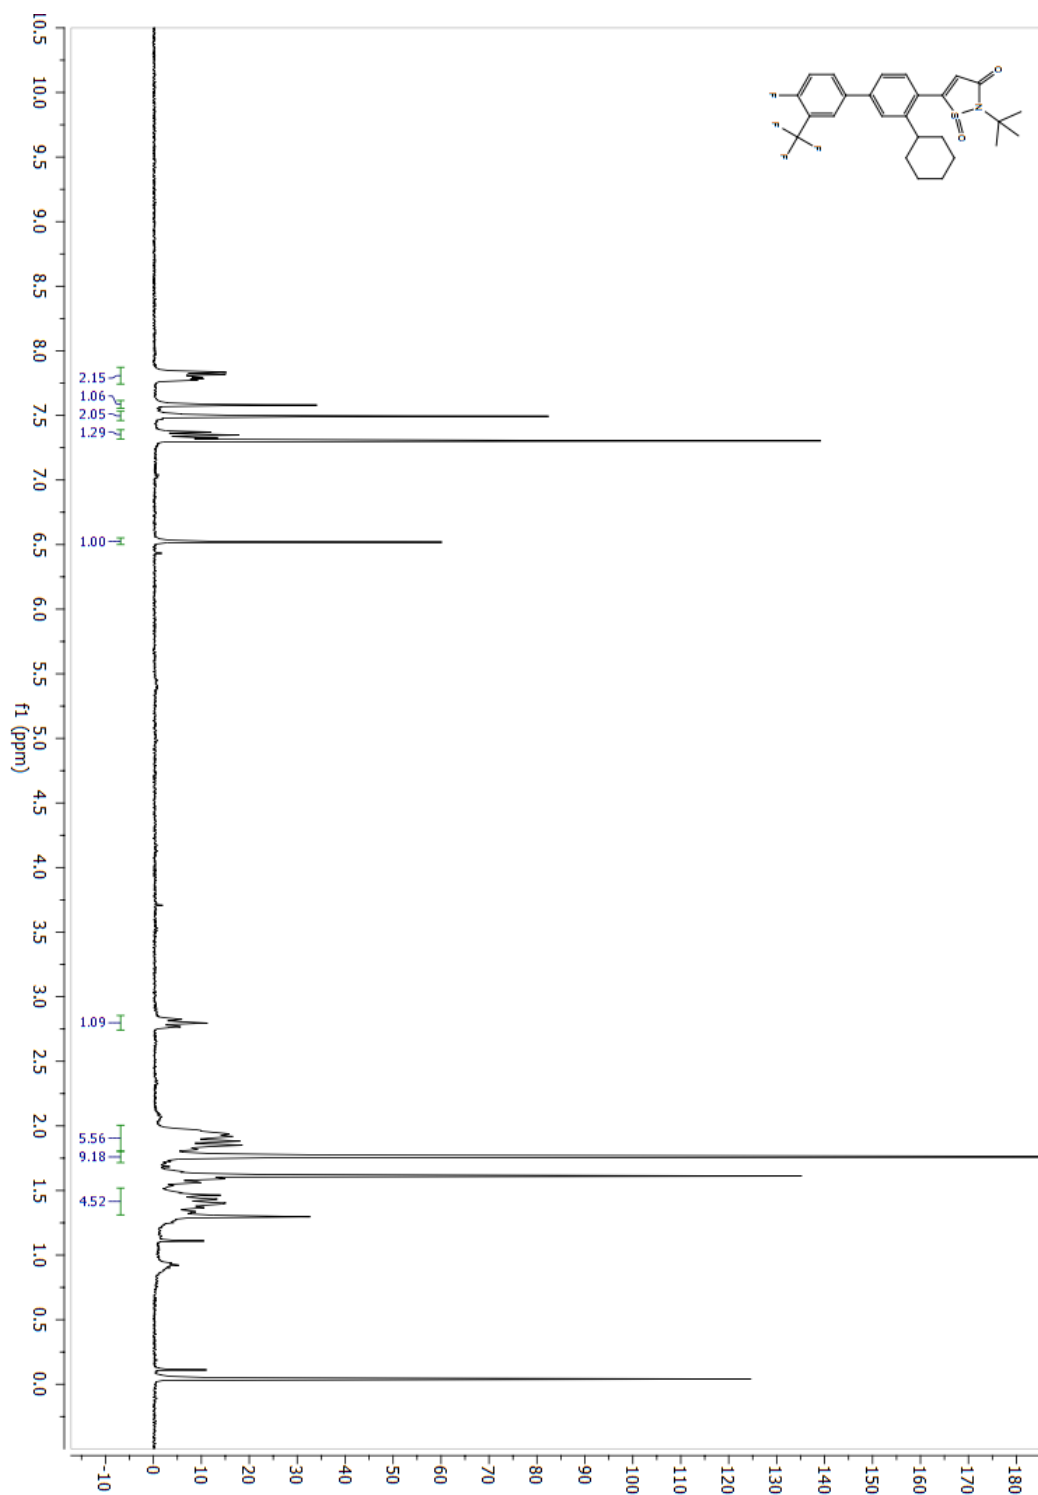

$^{19}\text{F}$ -NMR of Compound **10**

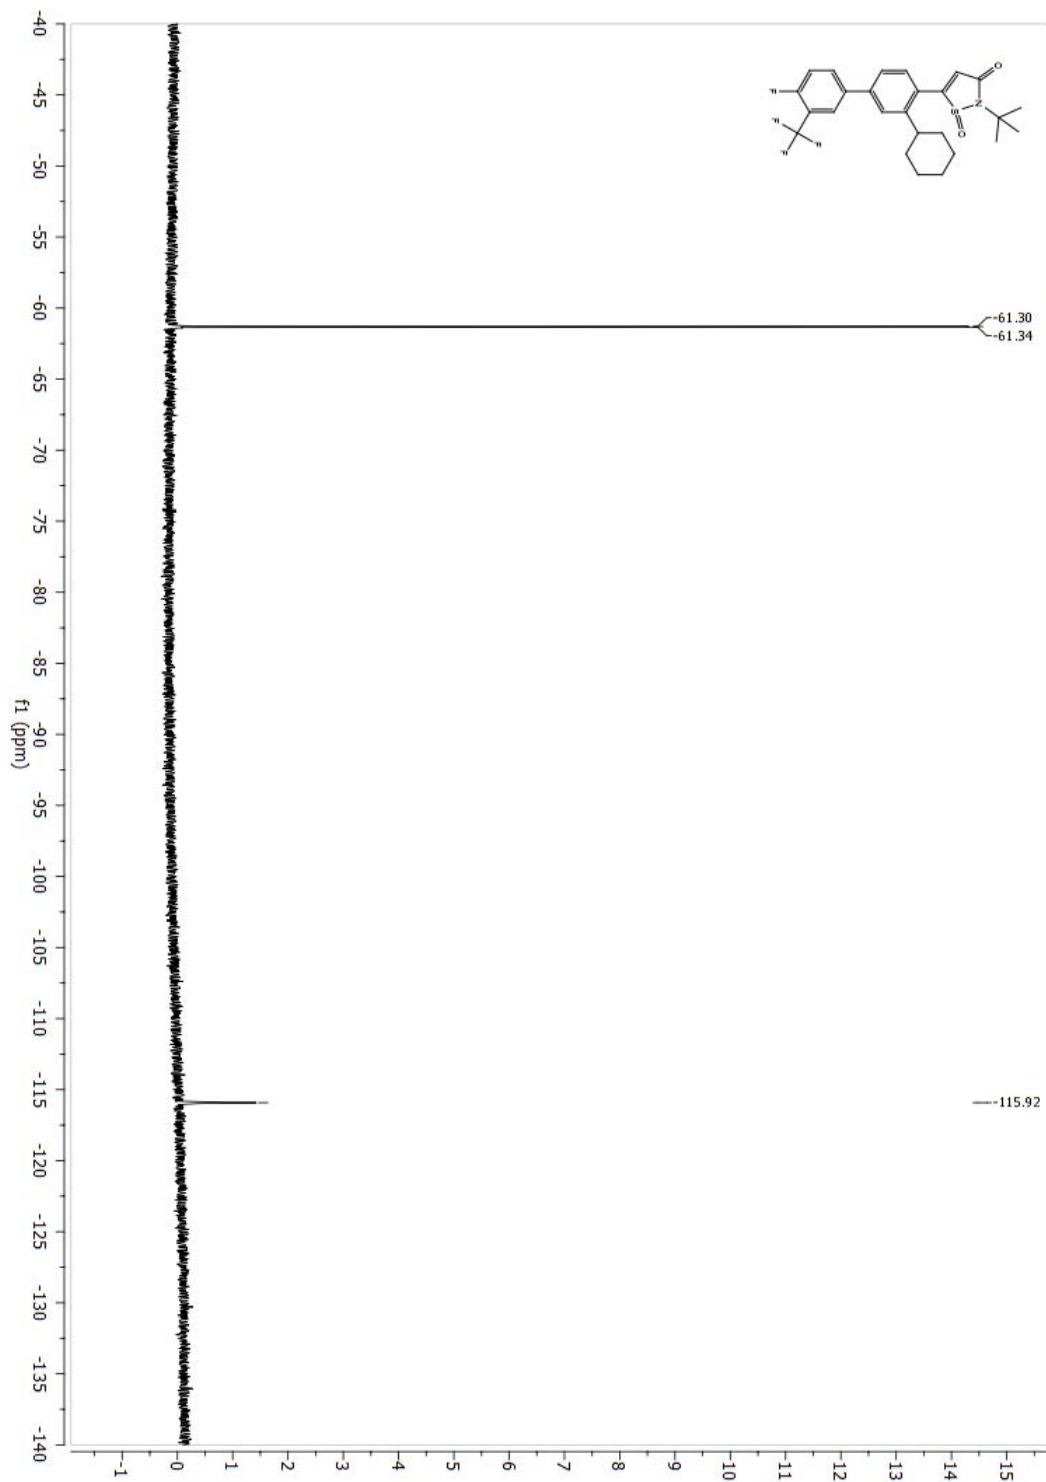

$^1\text{H}$ -NMR of Compound **11**

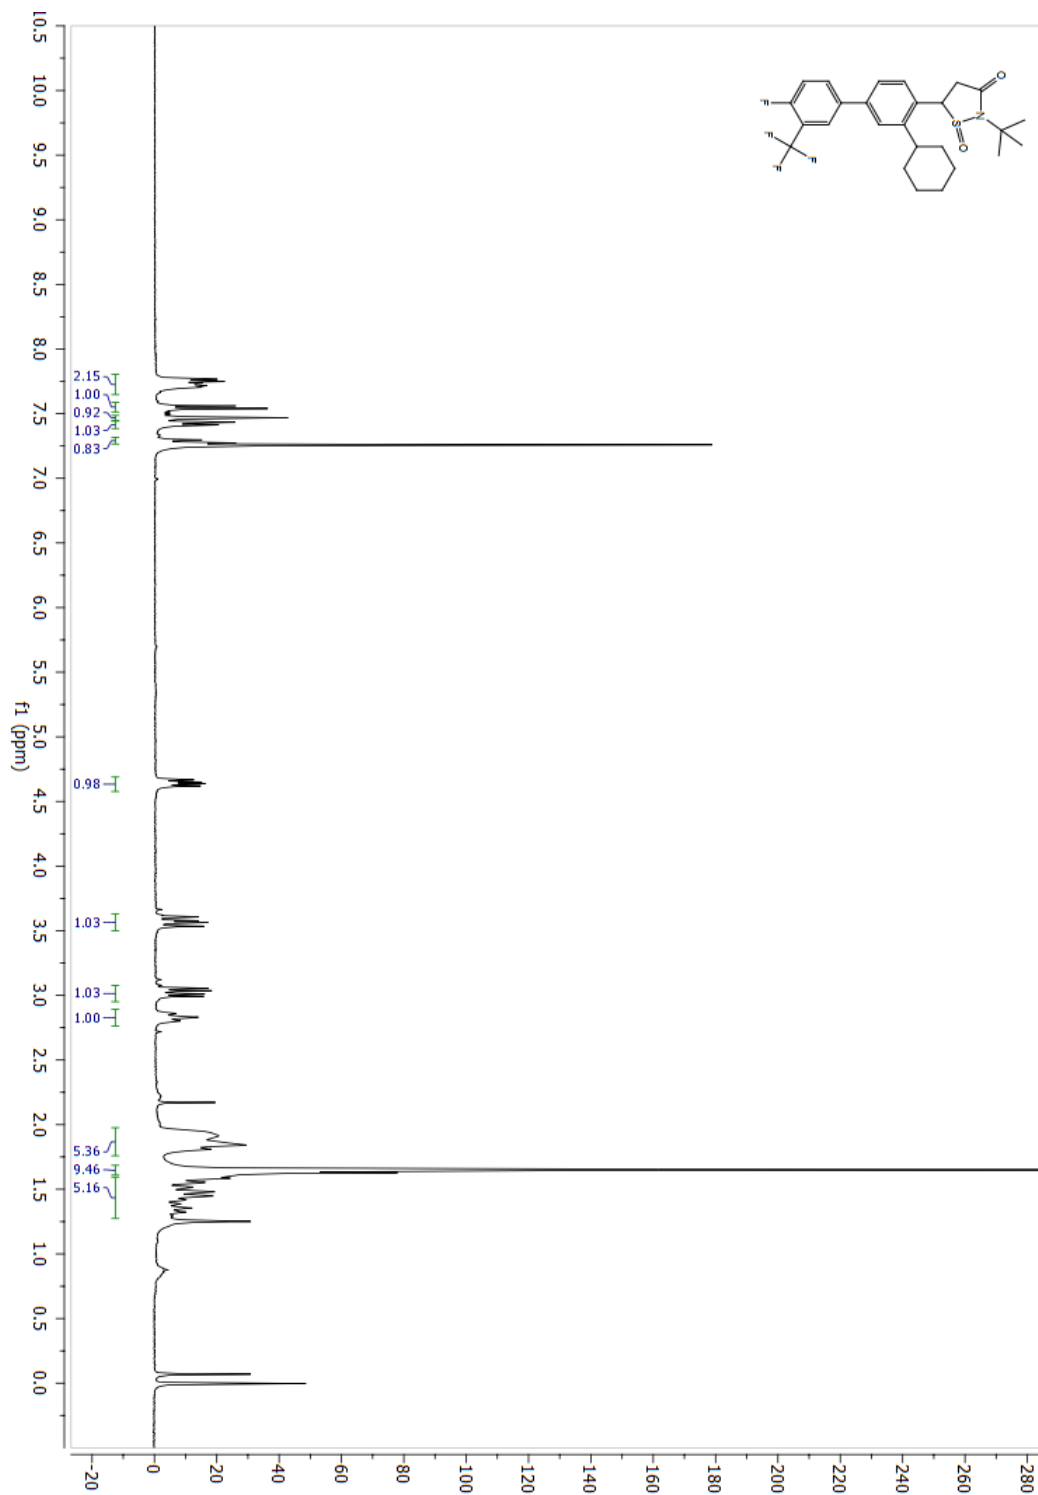

$^{19}\text{F}$ -NMR of Compound **11**

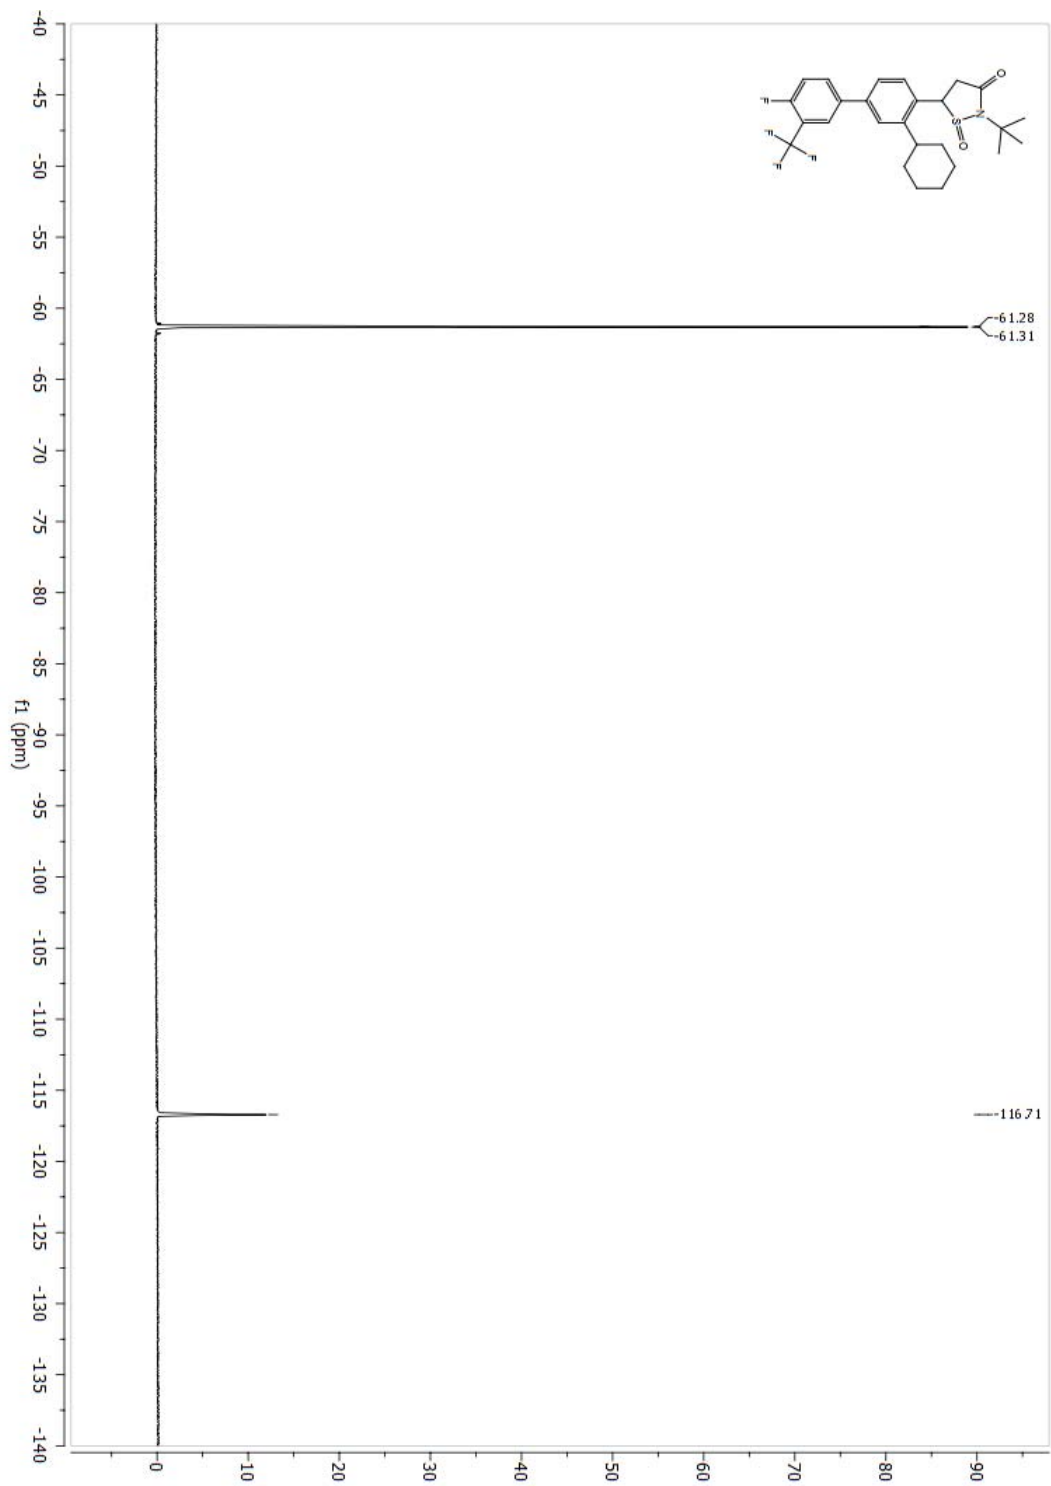



<sup>1</sup>H-NMR of Compound **12**

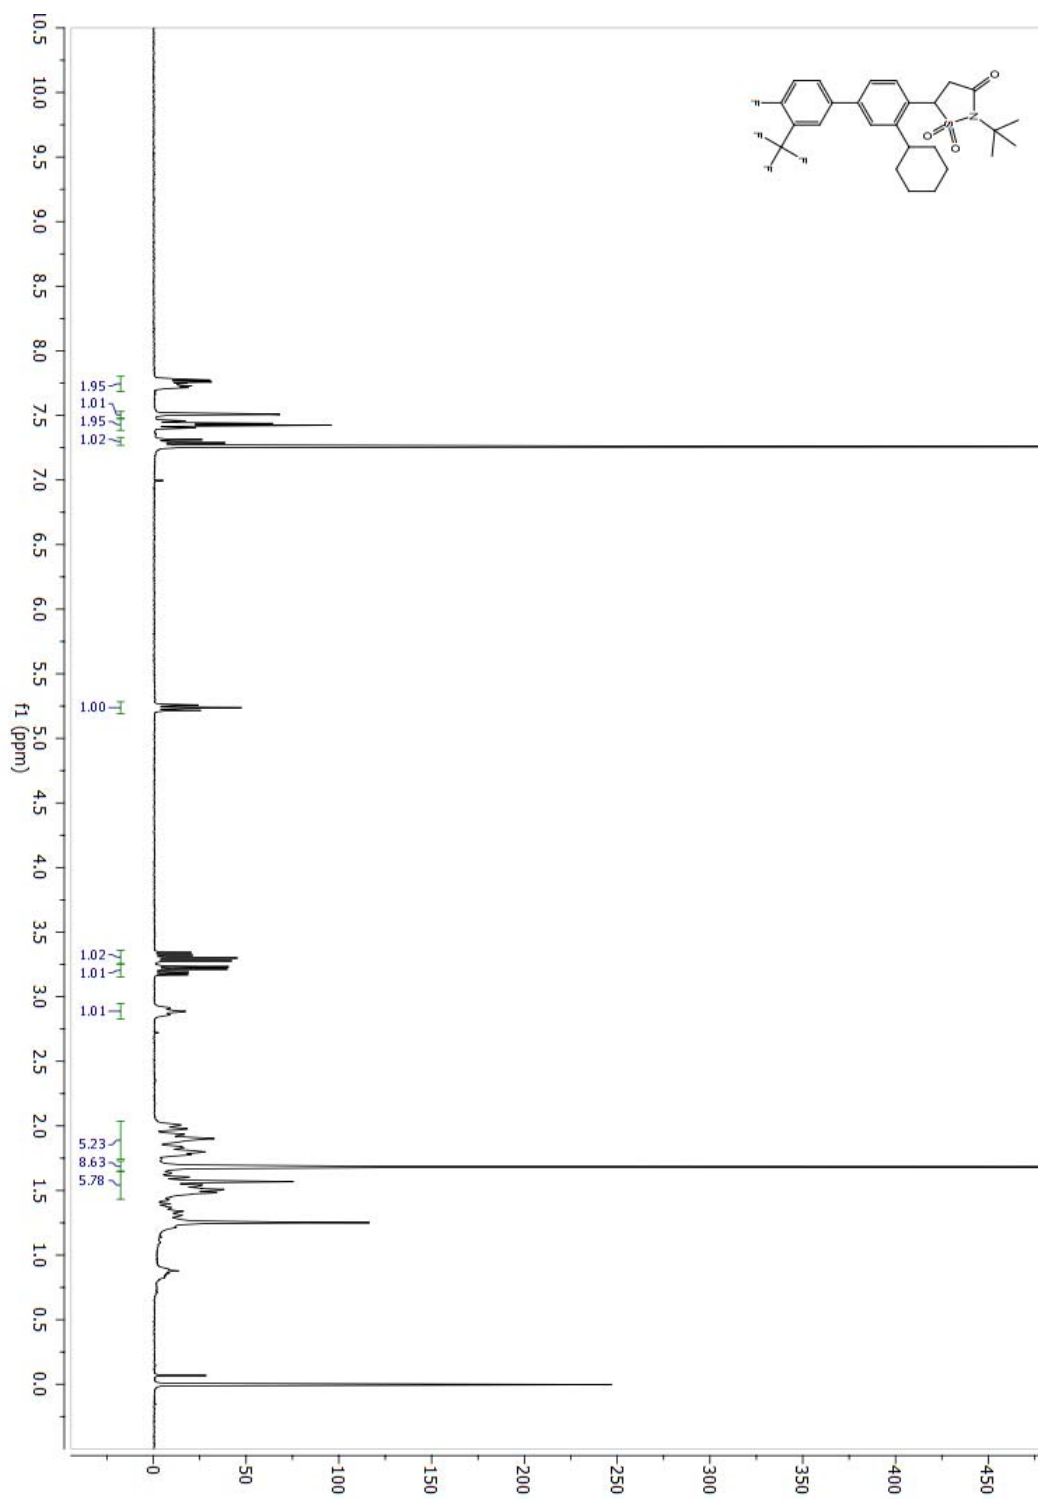

$^{19}\text{F}$ -NMR of Compound **12**

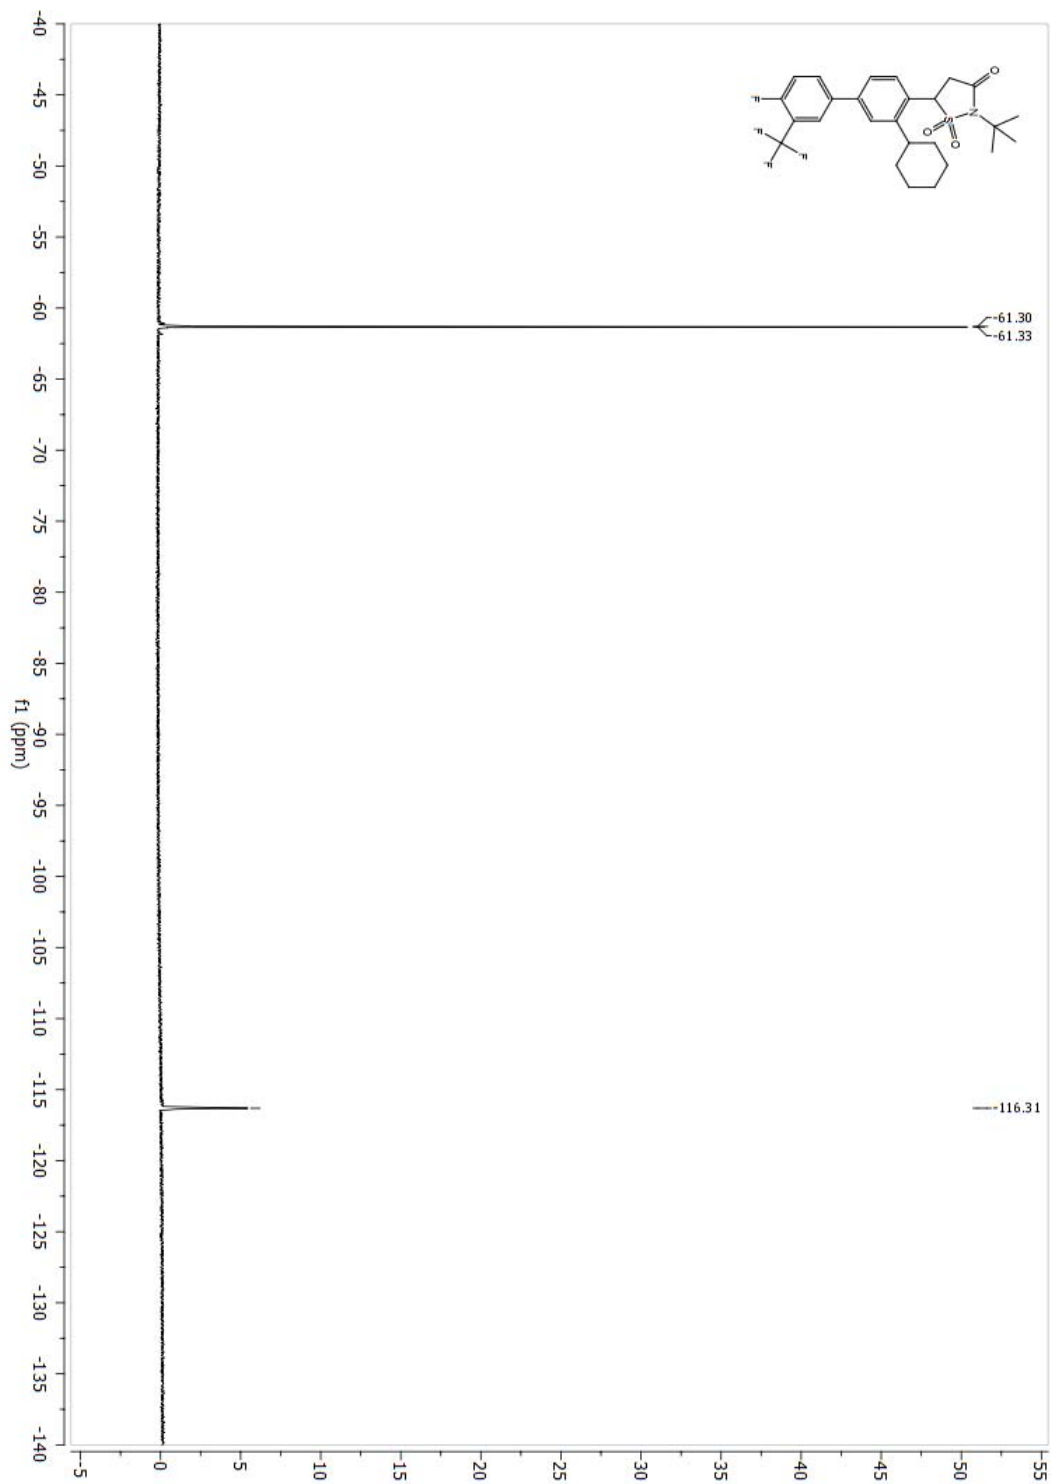

<sup>1</sup>H-NMR of Compound 2

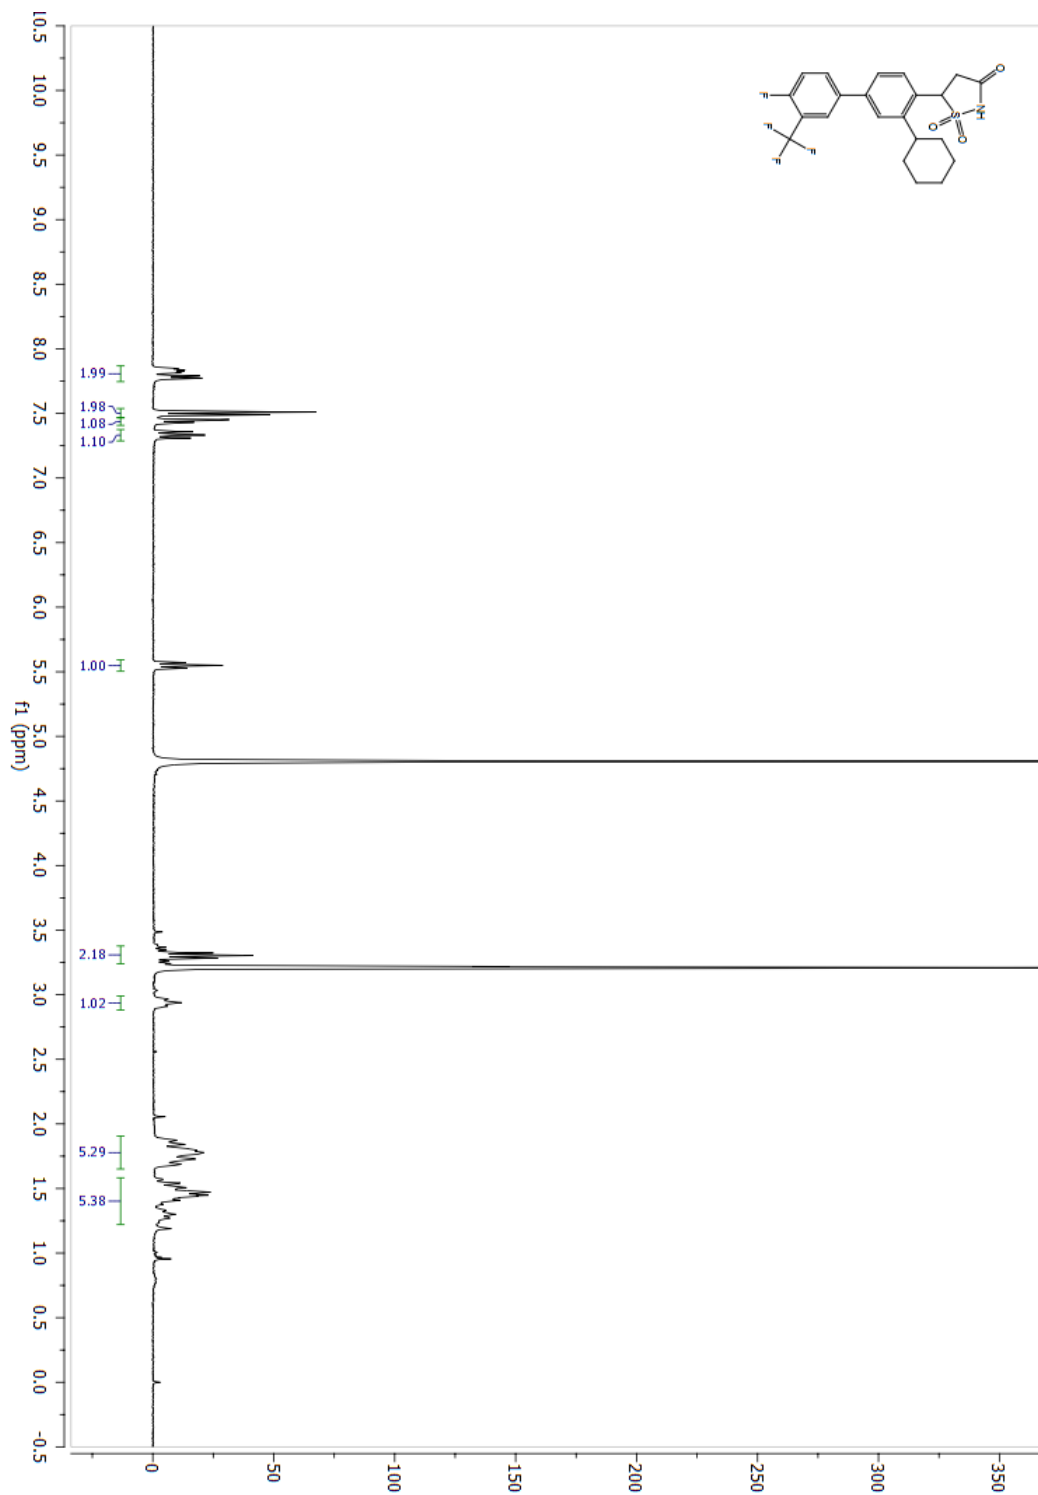

$^{19}\text{F}$ -NMR of Compound 2

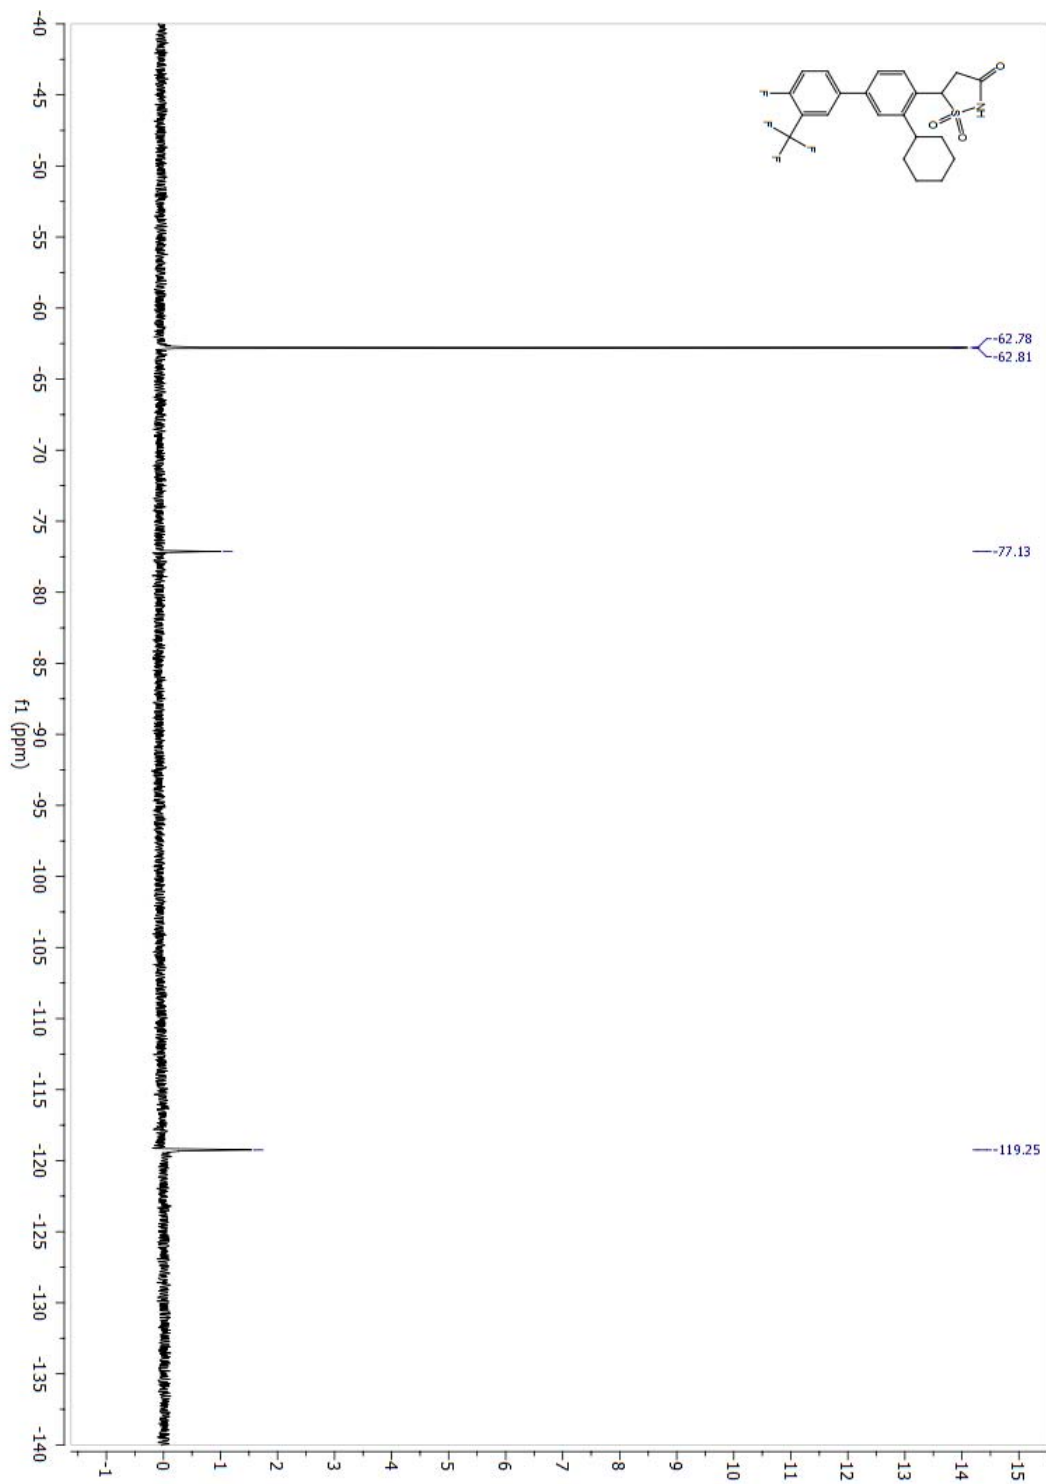

<sup>1</sup>H-NMR of Compound **21**

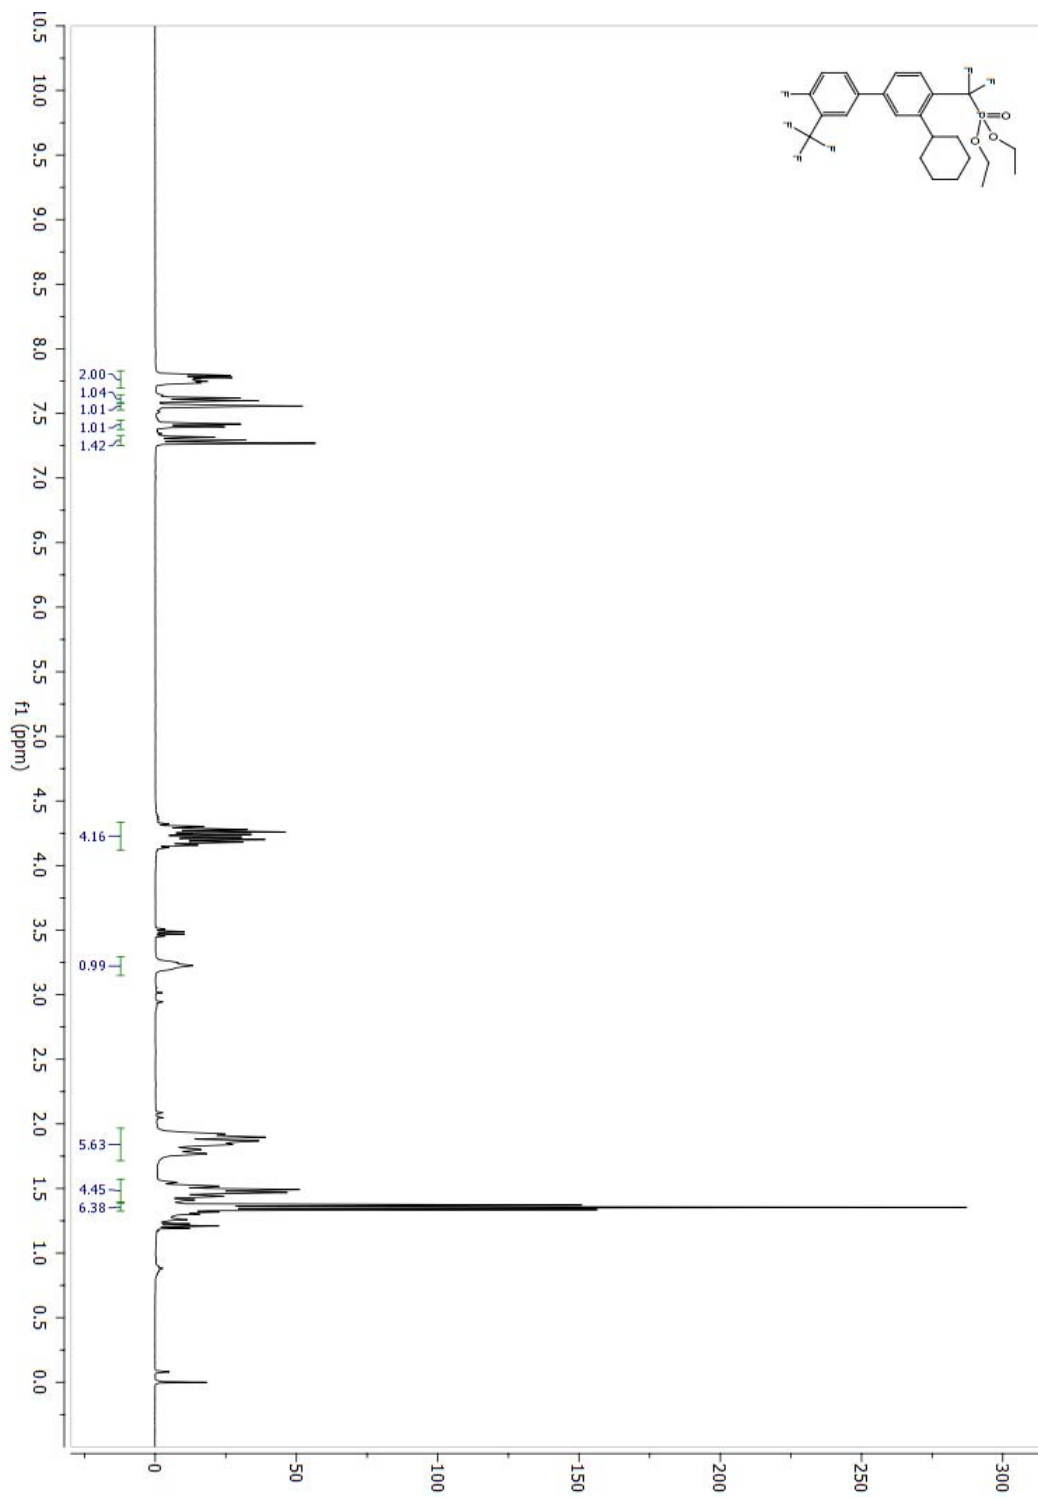

$^{19}\text{F}$ -NMR of Compound **21**

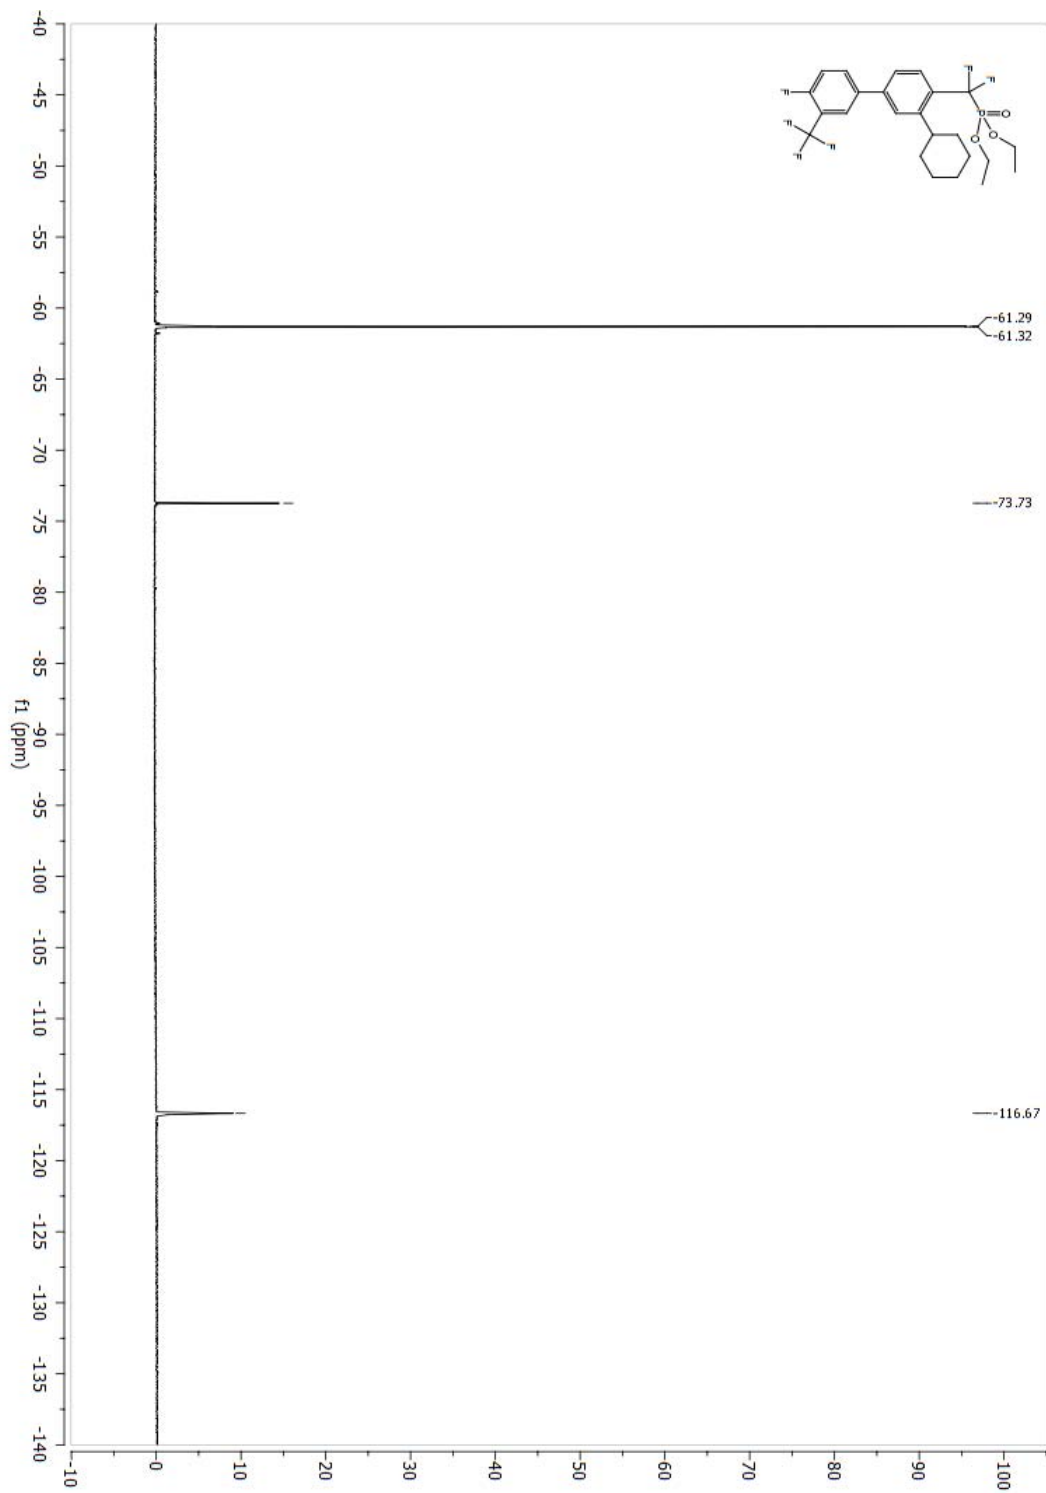

$^{13}\text{P}$ -NMR of Compound **21**

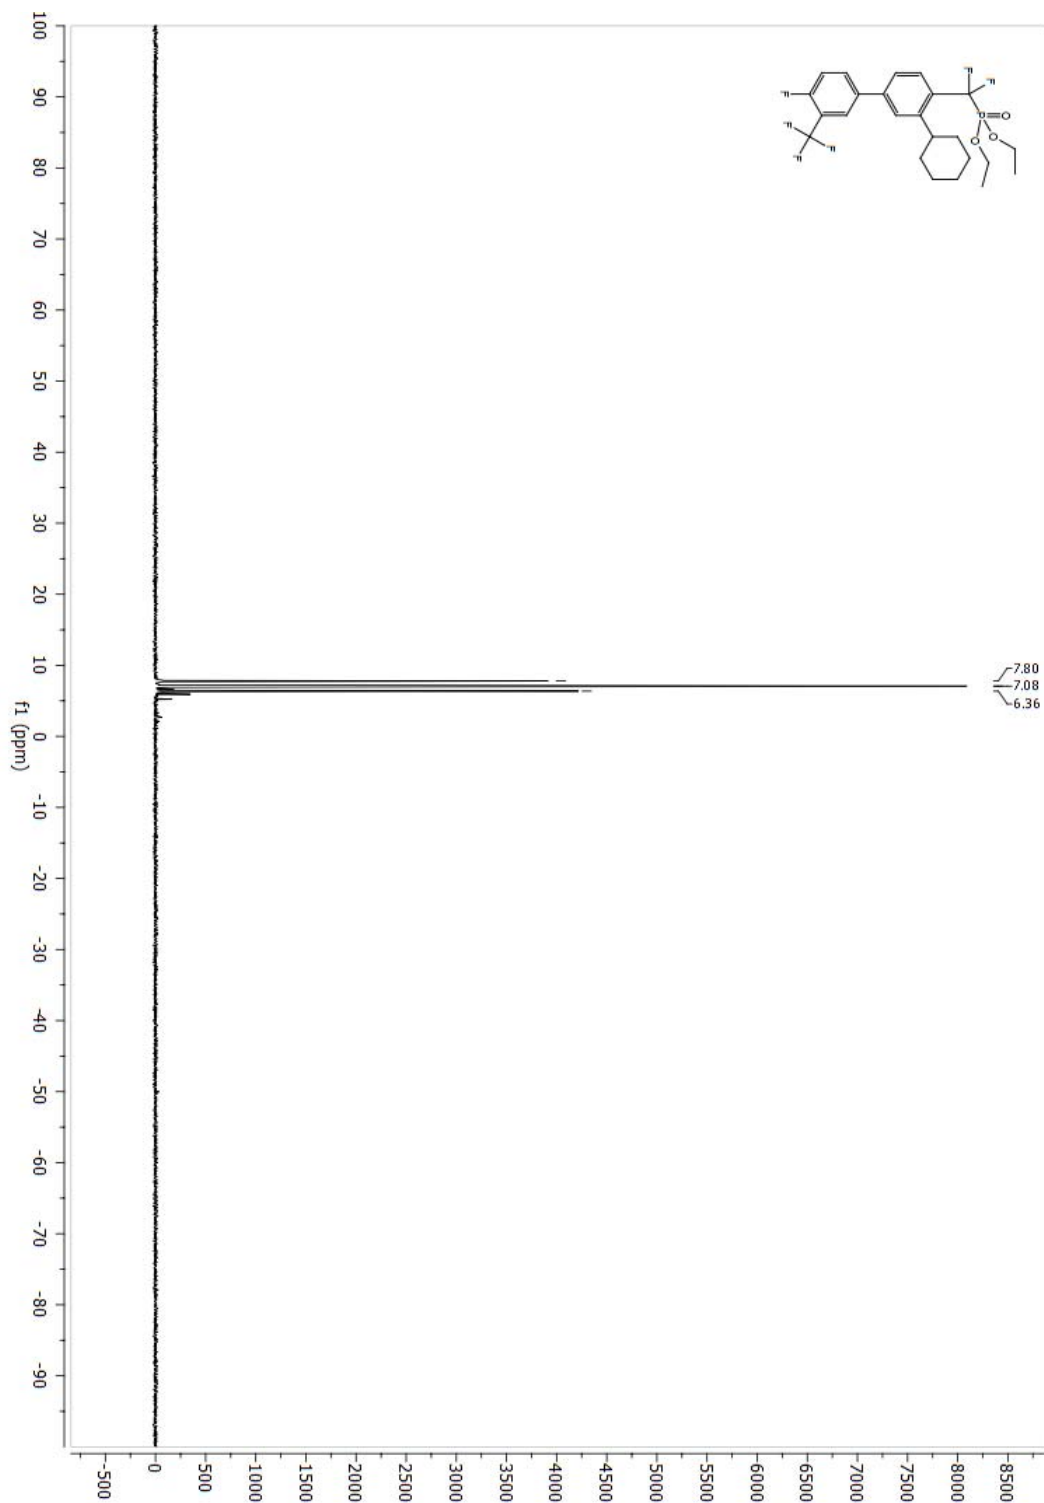

<sup>1</sup>H-NMR of Compound **3**

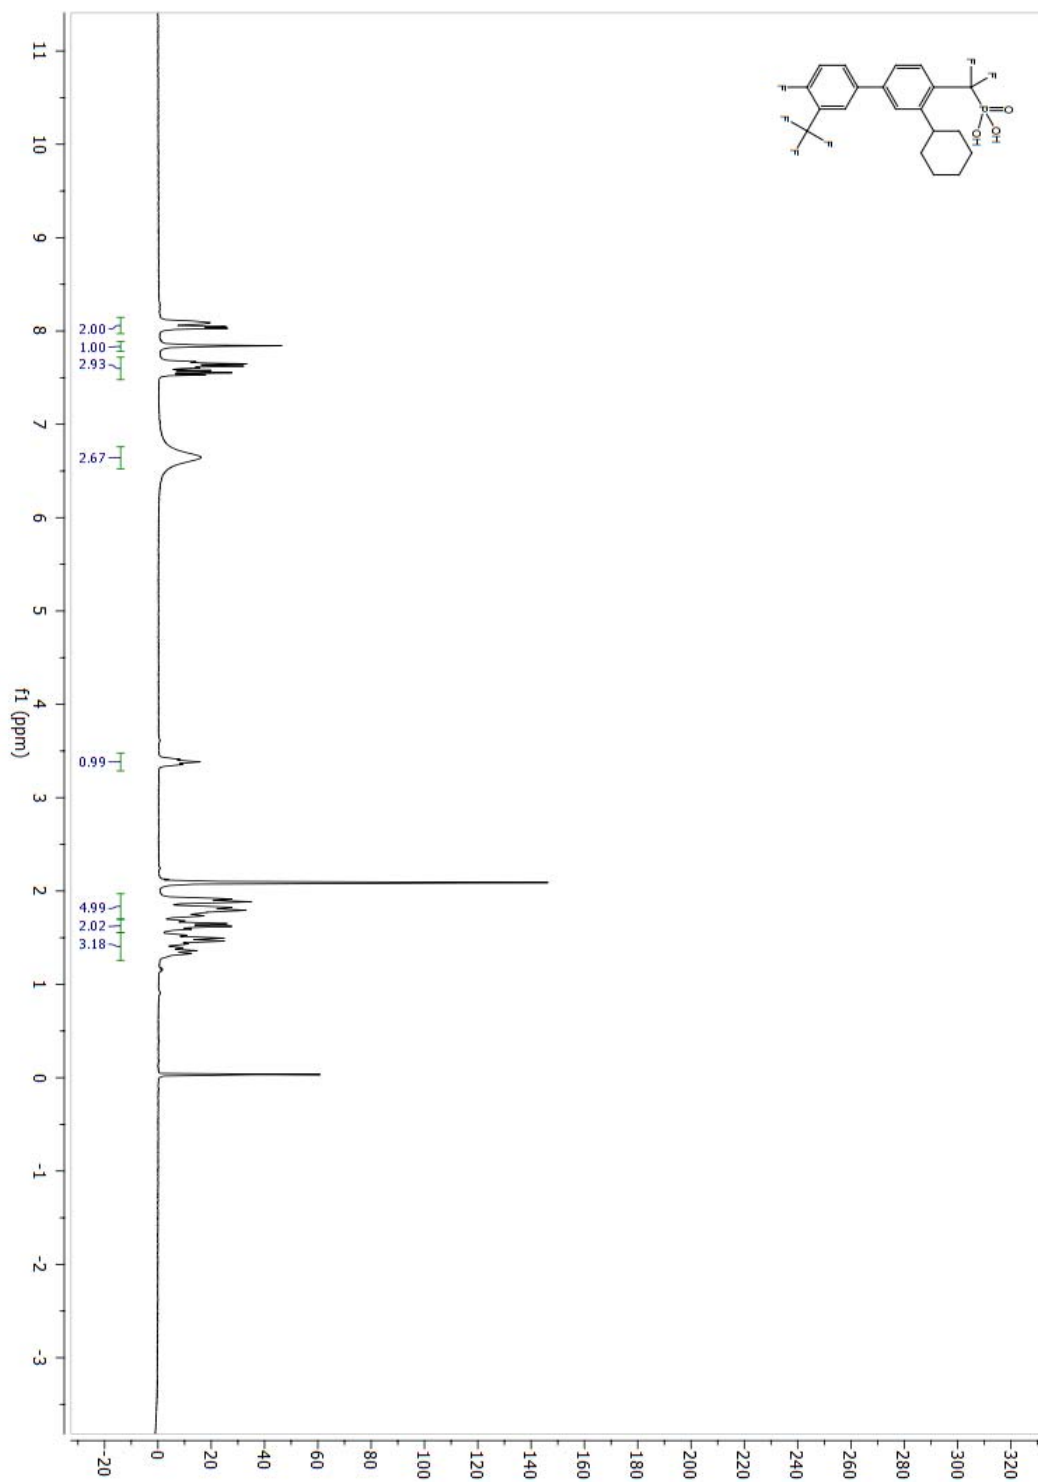



$^{19}\text{F}$ -NMR of Compound **3**

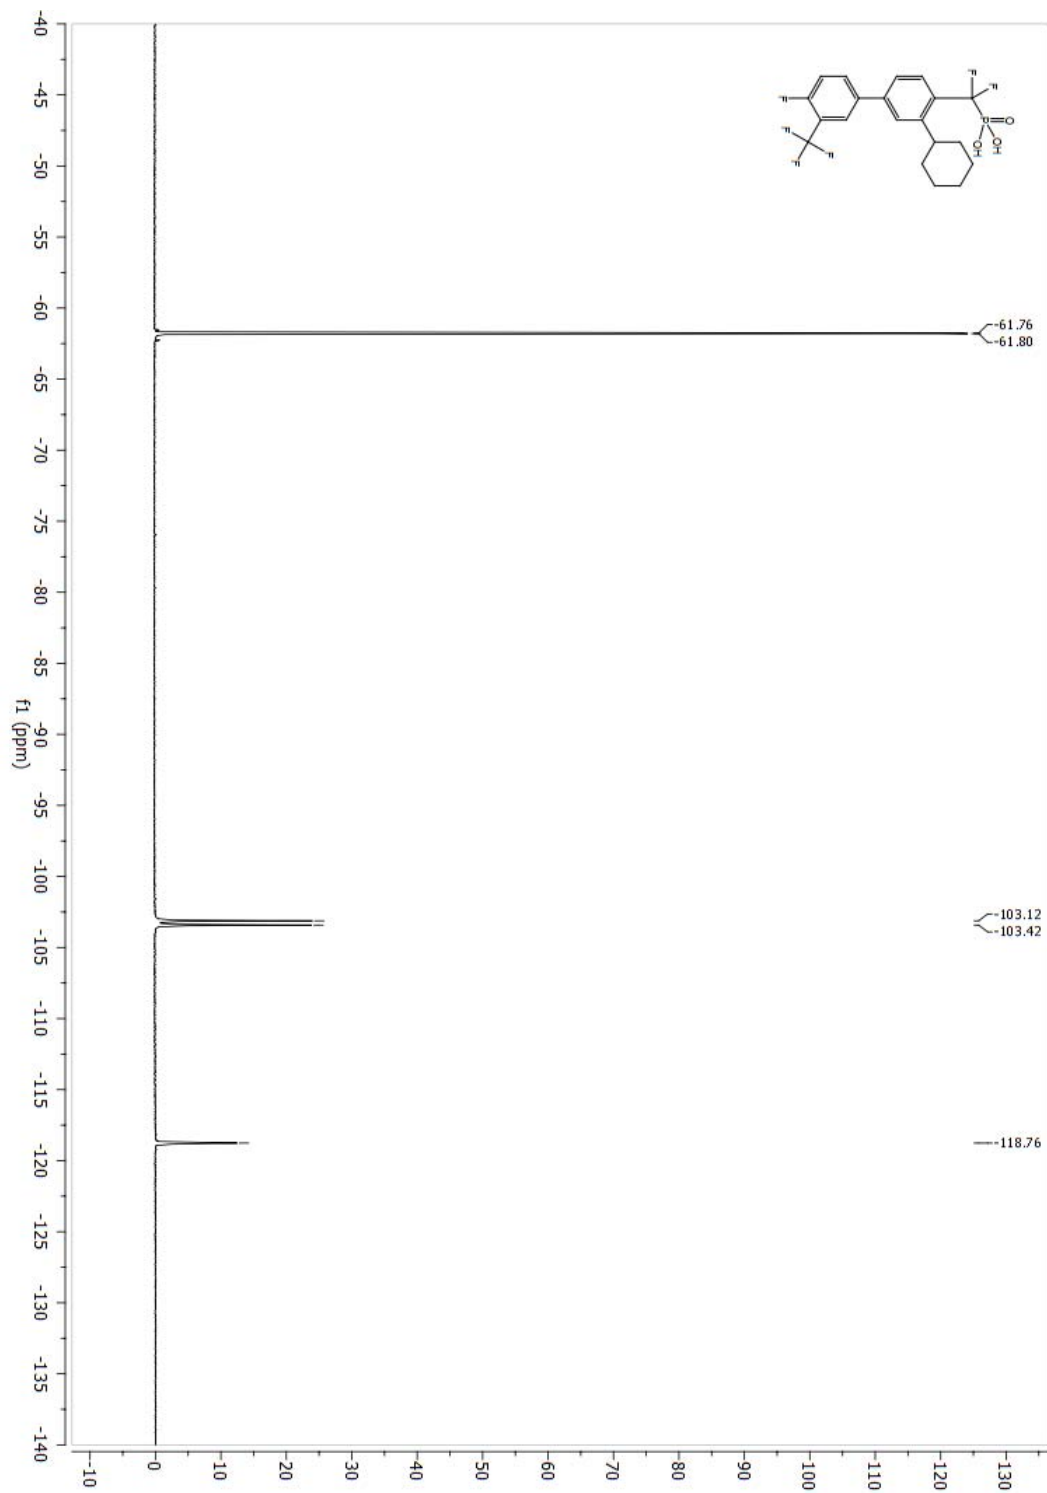

$^{31}\text{P}$ -NMR of Compound 3

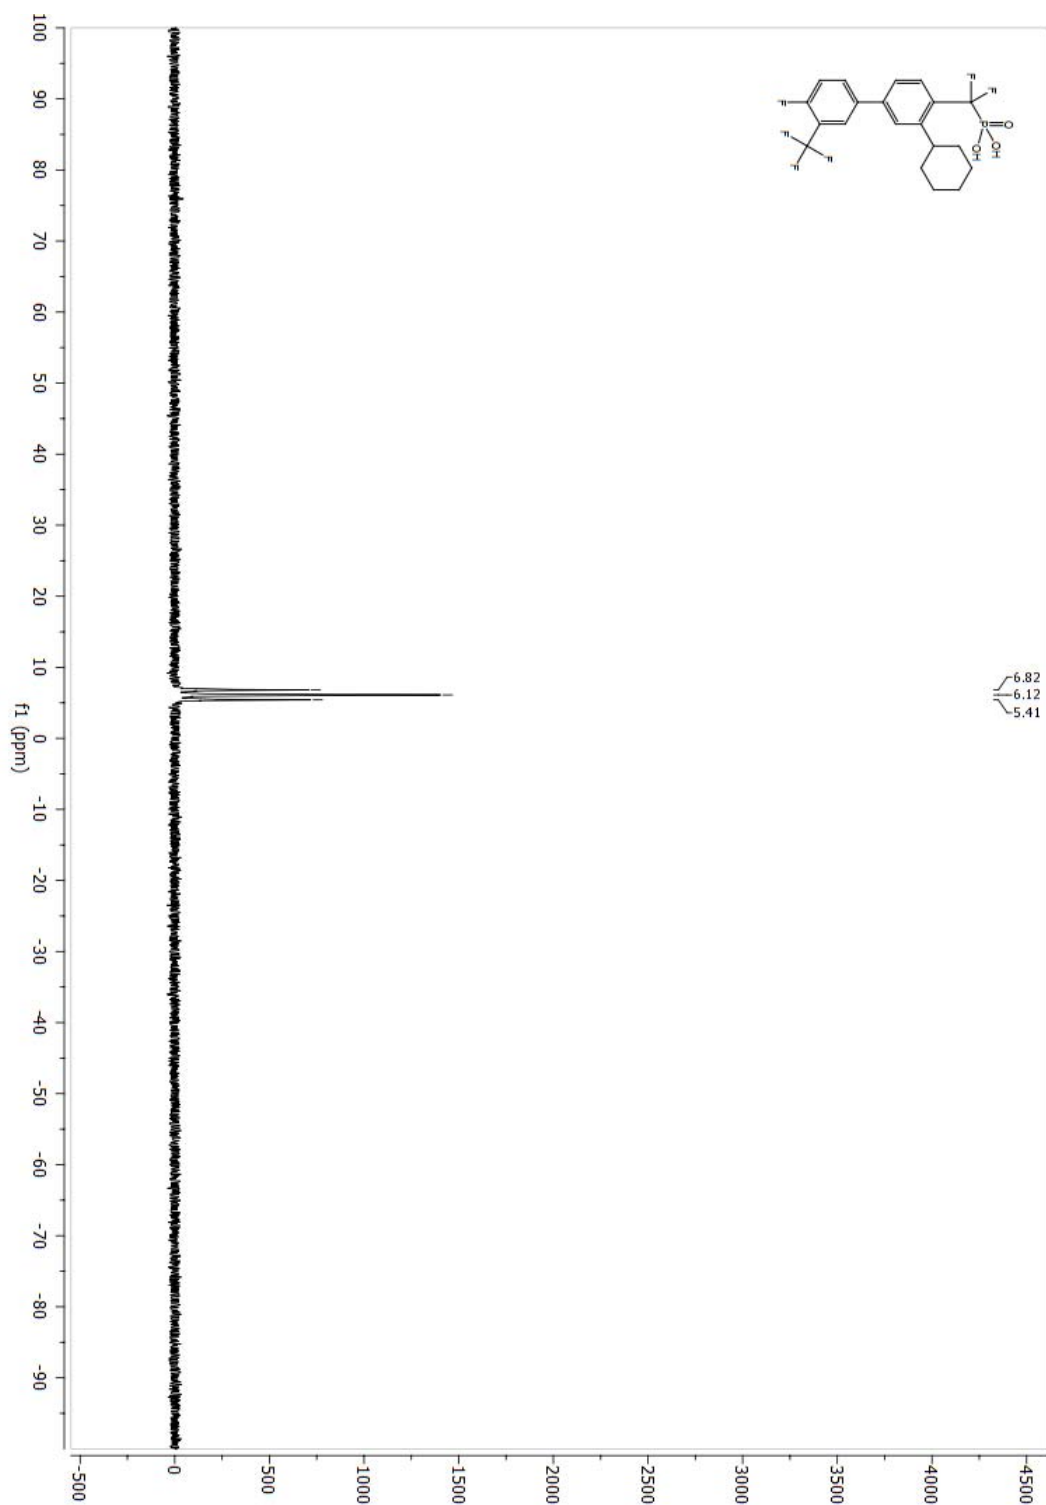

## References

- 1 Soellner, M. B.; Rawls, K. A.; Grundner, C.; Alber, T.; Ellman, J. A., *J. Am. Chem. Soc.*, 2007, **129**, 9613-9615.
- 2 Combs Andrew, P.; Glass, B.; Galya Laurine, G.; Li, M., *Org. Lett.*, 2007, **9**, 1279-82; Combs, A. P.; Yue, E. W.; Bower, M.; Ala, P. J.; Wayland, B.; Douty, B.; Takvorian, A.; Polam, P.; Wasserman, Z.; Zhu, W.; Crawley, M. L.; Pruitt, J.; Sparks, R.; Glass, B.; Modi, D.; McLaughlin, E.; Bostrom, L.; Li, M.; Galya, L.; Blom, K.; Hillman, M.; Gonnevill, L.; Reid, B. G.; Wei, M.; Becker-Pasha, M.; Klabe, R.; Huber, R.; Li, Y.; Hollis, G.; Burn, T. C.; Wynn, R.; Liu, P.; Metcalf, B., *J. Med. Chem.*, 2005, **48**, 6544-6548.
